# Supplementary material for: Identification of rare HIV-1–infected patients with extreme CD4+ T cell decline despite ART-mediated viral suppression
Source: JCI journal article supplement (doi:10.1172/jci.insight.127113), 2019-04-17

## **Supplementary Material**

### **Case reports:**

#### **Patient EXID#1**

49 years-old African woman (Zambia) originally diagnosed with HIV/AIDS after an infectious work-up for prolonged history of headache, sore throat and cervical lymphadenopathy. On presentation, HIV-1 plasma viral load was >100,000 copies/mL, CD4 count was 102 cells/ $\mu$ L (7%), and she had infection with a circulating recombinant form (CRF) BC. She had no AIDS defining illnesses nor clinical or laboratory evidence of malignancy, lymphoproliferative or hematologic disorders but reported a past medical history of malaria and herpes zoster, 1 year prior the HIV/AIDS diagnosis. ARV treatment with TFV/FTC/EFV was started and resulted in consistent suppression of viral load below the limit of detection but CD4 remained as low as 36 cells/ $\mu$ L, 5%, after 192 weeks of ART.

#### **Patient EXID#2**

18 years-old African man (Congo) originally diagnosed with HIV-1 infection during medical screening performed for immigration purposes. On presentation, HIV-1 plasma viral load was 82,000 copies/mL and CD4 count was 211 cells/ $\mu$ L, 12%, had HIV-1 subtype C infection. He did not have any opportunistic infection nor clinical, radiological or laboratory evidence of malignancy, lymphoproliferative or hematologic disorders but developed a diffuse monomorphic papular eruption consistent with lichen spinulosus which required topical steroid treatment. ARV treatment with AZT/3TC/NLF was started with CD4 count of 315 cells/ $\mu$ L, 15%, at time of ART initiation. ART resulted in prompt and consistent suppression of viral load below the limit of detection but CD4 progressively declined with a nadir of 22 cells/ $\mu$ L, 5%, after 339 weeks of ART with 4 different regimens and remained 52 cells/ $\mu$ L, 7%, after 357 weeks of ART.

#### **Patient EXID#3**

13 years-old African male (Burundi) with history of perinatal infection and originally diagnosed with HIV-1 infection during medical screening performed for immigration purposes. On presentation, HIV-1 plasma viral load was 13,163 copies/mL, CD4 count was 179 cells/ $\mu$ L, 8%, and had HIV-1 subtype C infection. He did not have any opportunistic infection, clinical,

radiological or laboratory evidence of malignancy nor lymphoproliferative or hematologic disorders but developed recurrent tinea capitis, molluscum contagiosum and skin warts. ARV treatment with AZT/3TC/rLPV was started with CD4 count of 179 cells/ $\mu$ L, 8%, at time of ART initiation. ART resulted in prompt and consistent suppression of viral load below the limit of detection but CD4 progressively declined with a nadir of 9 cells/ $\mu$ L, 2%, after 112 weeks of ART with 4 different regimens and remained 26 cells/ $\mu$ L, 6%, after 357 weeks of ART.

#### **Patient EXID#4**

25 years-old male (Israel) originally diagnosed with HIV-1 infection during routine screening test prompted by high risk male-who-have-sex-with-male (MSM) activity. Previous negative HIV test was obtained six months prior. At time of HIV-1 infection diagnosis, HIV-1 plasma viral load was 110 copies/mL, CD4 count 764 cells/ $\mu$ L, 39%, HIV subtype was a CRF AG. He did not have any opportunistic infection or any significant medical history. ARV treatment with TFV/FTC/Rilpivirine was started with CD4 count of 561 cells/ $\mu$ L, 32%, and HIV-1 plasma viral load of 660 copies/mL. ART resulted in prompt and consistent suppression of viral load below the limit of detection but CD4 progressively declined and remained as low as 68 cells/ $\mu$ L, 11%, after 144 weeks of ART with 3 different regimens. During his clinical course he developed recurrent episodes of lichenoid dermatitis requiring intermittent courses of topical steroids, but did not develop any opportunistic infection.

#### **Patient EXID#5**

40 years-old African female (Zambia), diagnosed with HIV/AIDS after an infectious work-up for oral and esophageal candidiasis. At time of HIV/AIDS diagnosis, HIV-1 plasma viral load was >100,000 copies/mL, CD4 count was 33 cells/ $\mu$ L, 4%, and she had HIV-1 subtype D infection. ARV treatment was started and resulted in prompt and consistent suppression of viral load below the limit of detection but CD4 progressively declined and remained as low as 9 cells/ $\mu$ L, 1%, after 192 weeks of ART with 3 different regimens. After approximately 226 weeks of ART, CD4-T-cell count started to progressively increase (highest on week 249 post-ART: 119 cell/ $\mu$ L, 12%). Alongside such CD4-T-cell reconstitution, EXID5 developed mental status decline with radiological evidence of basilar arteritis and cerebral ischemic lesions. A clinical diagnosis of CNS tuberculosis was formulated but did not result in significant clinical improvement in her mental

status. The patient was lost to follow-up after family requested her discharge from an skilled nursing facility.

## Supplementary Figures Legend

**Figure 1.** Proportion of CD4 and CD8-T cells in HC, INR, IR and EXID. The median (red bar), interquartile range (error bar) and each subject (symbols) is presented for HC (n=13), IR (n=8), INR (n=15), EXID (n=5). Each EXID subject is identified by a different grey filled shape.

**Figure 2.** Distribution of CD4-T-cell maturation subsets in HC, INR, IR and EXID based on expression of CD27 and CD45RO. The median (red bar), interquartile range (error bar) and each subject (symbols) is presented for HC (n=5), IR (n=8), INR (n=15), EXID (n=5). Each EXID subject is identified by a different grey filled shape. \* $p \leq 0.05$  in the comparison indicated by the black horizontal line as determined by Kruskal-Wallis test followed by Dunn's post-hoc test.

**Figure 3.** Distribution of CD8-T-cell maturation subsets in HC, INR, IR and EXID based on expression of CD27 and CD45RO. The median (red bar), interquartile range (error bar) and each subject (symbols) is presented for HC (n=5), IR (n=8), INR (n=15), EXID (n=5). Each EXID subject is identified by a different grey filled shape. \* $p \leq 0.05$  in the comparison indicated by the black horizontal line as determined by by Kruskal-Wallis test followed by Dunn's post-hoc test.

**Figure 4.** Correlation between the serum levels of IL-7 and CD4-T-cell counts in IR (n=8), INR (n=13), EXID (n=5). Each EXID subject is identified by a different grey filled shape. Spearman  $\rho$ : -0.53 (CI 95%: -0.76, -0.17),  $p < 0.004$ .

**Figure 5.** Ingenuity pathway analysis (IPA) of genes differentially expressed in PBMC from patients with EXID compared to PBMC of ARV-treated immunological responders. Canonical pathways significantly differentially regulated are listed according to their p value (left Y axis, -Log, height of bars), the regulation z-score algorithm to identify pathways that are upregulated (positive z-score, orange) or downregulated (negative z-score, blue) and the ratio of list genes found to be differentially regulated in each pathway compared to the total number of genes in that pathway (right Y axis, orange squares).

**Figure 6.** Telomeres length in different peripheral blood mononuclear cell types in EXID2.

**Figure 7.** CD4-T-cell trends in EXID1 (A) and EXID5 (B). The dotted line indicates the pre-ART CD4-T-cell count level.

**Figure 8.** Clinical, radiological and histopathological findings in EXID4. **A.** Right palpebral edema, ptosis and hypotropia, subsequently resolved (**B**) after initiation of infliximab. **C.** Hypermetabolic right orbital mass infiltrating the right superior extraocular muscle and modeling of the superior right orbital bone as seen on PET-CT. **D.** Right orbital mass biopsy with granulomatous inflammation and dense fibrosis. The asterisk denotes the area showed at higher magnification in the left panel. **E.** Immunostaining for Myxovirus resistance gene A (MxA), an interferon alpha induced gene, Collagen-1 (**F**), CD68/CD163 and CD4 in the germinal center (GC) and T-cell zone (TCZ) (**G**) in lymph nodes of ICL, HIV-1 infected individuals (pre-ART and 24 weeks post-ART) and EXID4 (52 weeks post-ART).

**Figure 9.** CD4-T-cell trends and quantitative Imaging in lymph node biopsy for EXID4. **A.** CD4-T-cells and HIV-1 viral load trends in relation to different ART treatment and infliximab. **B.** The percentage area positive for MxA in lymph node biopsies from a subject with ICL, HIV/AIDS immunological responder (IR) pre- and post-ART and in EXID4 as was quantified using Cell-profiler-version 3.1.5 and compared to health subjects (red dotted line). **C.** The percentage area positive for Collagen-1 in lymph node biopsies from a subject with ICL, HIV/AIDS immunological responder (IR) pre- and post-ART and in EXID4 as was quantified using Cell-profiler-version 3.1.5 and compared to health subjects (red dotted line). **D** The percentage area positive for CD4 in lymph node biopsies from a subject with ICL (yellow), HIV/AIDS immunological responder (IR) pre- and post-ART (green) and in EXID4 (grey hatched) as was quantified using Cell-profiler-version 3.1.5 and compared to healthy subjects (red dotted line) in germinal center (GC) and paracortical T-cell zone (TCZ).

**Figure 10.** Quantification of active caspase-1 in T lymphocytes. PBMCs from patients and a healthy donor were incubated with the fluorochrome inhibitor of caspase-1 (FAM-FLICA), stained for lymphocyte identification and acquired by Imaging flow cytometry. The number of CD4-T cells (**A**) or CD8-T cells (**B**) showing spontaneous caspase-1 activation was assessed as the percentage of FLICA positive cells, by using IDEAS software.

## Supplementary Tables

**Supplementary Table 1.** T cell subpopulations in healthy subjects (HC, n=13), immunological-responders (IR, n=8), immunological non-responders (INR, n=15) and extreme immune-decline (EXID, n=5). Data expressed as median percentage and interquartile range (25<sup>th</sup>-75<sup>th</sup> percentile).

| <b>T cell subpopulations</b>                 | <b>HC</b>     | <b>IR</b>  | <b>INR</b> | <b>EXID</b> |
|----------------------------------------------|---------------|------------|------------|-------------|
| <b>CD4*</b>                                  | 68 (62-73)    | 31 (27-39) | 19 (14-25) | 9 (4-12)    |
| <b>CD8</b>                                   | 24 (19-29)    | 58 (53-63) | 66 (59-75) | 63 (48-83)  |
| <b>^CD4 Naïve (CD27+CD45RO-)</b>             | 43 (25-51)    | 43 (30-62) | 32 (17-47) | 4 (1-26)    |
| <b>CD4 Central Memory (CD27+CD45RO+)</b>     | 50 (43-59)    | 46 (33-60) | 45 (40-60) | 15 (12-37)  |
| <b>CD4 Effector Memory (CD27-CD45RO+)</b>    | 5 (3-10)      | 8 (5-12)   | 14 (9-26)  | 66 (9-16)   |
| <b>CD4 Effector (CD27-CD45RO-)</b>           | 0 (0-3)       | 1 (0-1)    | 0 (0-1)    | 2 (0-14)    |
| <b>°CD8 Naïve (CD27+CD45RO-)</b>             | 55 (47-62)    | 30 (13-65) | 21 (12-35) | 8 (4-21)    |
| <b>CD8 Central Memory (CD27+CD45RO+)</b>     | 33 (20-38)    | 15 (13-18) | 19 (16-27) | 11 (9-19)   |
| <b>CD8 Effector Memory (CD27-CD45RO+)</b>    | 6 (4-10)      | 19 (8-43)  | 30 (16-41) | 32 (15-60)  |
| <b>CD8 Effector (CD27-CD45RO-)</b>           | 6 (3-11)      | 20 (14-29) | 20 (16-25) | 36 (24-54)  |
| <b>^CD4 CD45RO+Ki67+</b>                     | 2 (2-8)       | 6 (4-18)   | 21 (9-28)  | 9 (6-16)    |
| <b>°CD8 CD45RO+Ki67+</b>                     | 1 (0.7-1.3)   | 2 (2-3)    | 3 (2-18)   | 4 (1-13)    |
| <b>^CD4 HLA+CD38+</b>                        | 0.6 (0.4-1.2) | 2 (1-2)    | 3 (2-3)    | 7 (1-9)     |
| <b>°CD8 HLA+CD38+</b>                        | 1 (0.7-3.3)   | 3 (2-5)    | 6 (4-10)   | 3 (2-18)    |
| <b>^CD4 CD45RO+PD1+</b>                      | 8 (3-12)      | 13 (3-18)  | 10 (6-30)  | 59 (34-90)  |
| <b>°CD8 CD45RO+PD1+</b>                      | 14 (9-23)     | 8 (5-16)   | 9 (5-20)   | 21 (9-25)   |
| <b>^Regulatory T cells (CD4+CD25+FoxP3+)</b> | 2 (1-3.7)     | 3 (3-6)    | 6 (4-8)    | 1 (0.8-3)   |
| <b>^CD4 CD27+CD45RO- CD127+</b>              | 89 (83-95)    | 79 (69-84) | 76 (72-80) | 79 (62-87)† |
| <b>CD4 CD27+CD45RO+ CD127+</b>               | 84 (79-87)    | 72 (69-81) | 67 (60-70) | 46 (38-70)† |
| <b>CD4 CD27-CD45RO+ CD127+</b>               | 94 (83-96)    | 82 (66-90) | 71 (60-84) | 55 (27-65)† |
| <b>°CD8 CD27+CD45RO- CD127+</b>              | 89 (86-92)    | 93 (79-95) | 87 (71-91) | 32 (32-55)† |
| <b>CD8 CD27+CD45RO+ CD127+</b>               | 83 (76-88)    | 72 (67-77) | 65 (57-74) | 39 (17-39)† |
| <b>CD8 CD27-CD45RO+ CD127+</b>               | 46 (36-83)    | 31 (21-57) | 28 (23-38) | 20 (5-32)†  |
| <b>CD8 CD27-CD45RO- CD127+</b>               | 28 (15-40)    | 21 (11-39) | 14 (13-18) | 11 (4-12)†  |

\*% of total CD3+ lymphocytes; ^ % of total CD3+CD4+; ° % of total CD3+CD8+.

†Sufficient material for the evaluation of the expression of CD127 was available from 3 patients with EXID.

**Supplementary Table 2.** Plasma concentration of cytokines/chemokines in healthy subjects (HC, n=10), idiopathic CD4-lymphopenia (ICL, n=11) immunological-responders (IR, n=8), immunological non-responders (INR, n=15) and extreme immune-decline (EXID, n=5). Data expressed as median picogram per milliliter (pg/mL) and interquartile range (25<sup>th</sup>-75<sup>th</sup> percentile).

| <b>Cytokine/Chemokine</b>       | <b>HC</b>        | <b>ICL</b>       | <b>IR</b>        | <b>INR</b>       | <b>EXID</b>      |
|---------------------------------|------------------|------------------|------------------|------------------|------------------|
| <b>IL-1<math>\beta</math></b>   | ND               | ND               | ND               | ND               | ND               |
| <b>IL-2</b>                     | 0.2 (0.07-0.25)  | 0.3 (0.2-0.35)   | 0.17 (0.09-0.22) | 0.19 (0.14-0.3)  | 0.34 (0.18-0.4)  |
| <b>IL-4</b>                     | ND               | ND               | ND               | ND               | ND               |
| <b>IL-6</b>                     | 0.4 (0.3-1.17)   | 0.5 (0.35-1.32)  | 1.22 (0.27-2.5)  | 0.5 (0.3-0.78)   | 0.16 (0.13-0.48) |
| <b>IL-7*</b>                    | 20.2 (13.5-25.7) | 30 (21-41)       | 21 (18-22)       | 23.6 (18-32)     | 44.8 (38-58)     |
| <b>IL-8</b>                     | 1.6 (0.76-3.3)   | 1.8 (1.6-3.7)    | 1.3 (0.9-1.8)    | 3.4 (2.2-4)      | 1.6 (1.2-4.3)    |
| <b>IL-10</b>                    | 0.3 (0.26-0.49)  | 0.3 (0.36-0.45)  | 0.3 (0.2-0.4)    | 0.24 (0.2-0.4)   | 0.07 (0.04-1.5)  |
| <b>IL-12p70</b>                 | 0.33 (0.2-0.4)   | 0.1 (0.1-0.38)   | 0.2 (0.1-0.4)    | 0.1 (0.1-0.3)    | 0.1 (0.06-0.1)   |
| <b>IL-13</b>                    | 0.67 (0.1-1.3)   | 0.15 (0.1-0.15)  | 0.15 (0.1-1)     | 0.15 (0.1-0.5)   | 0.1 (0.1-10.15)  |
| <b>IL-18</b>                    | 1357 (1007-1586) | 2150 (1760-2707) | 1273 (790-1373)  | 1490 (1159-1821) | 1611 (882-2554)  |
| <b>TNF<math>\alpha</math></b>   | 2.5 (2.2-2.8)    | 3.3 (2.2-4)      | 3 (2.6-4.6)      | 3.3 (2.9-4.6)    | 2 (1.7-2.25)     |
| <b>Eotaxin</b>                  | 95 (83-177)      | 94 (71-114)      | 108 (84-137)     | 139 (86-182)     | 76 (47-105)      |
| <b>Eotaxin-3</b>                | 33 (22-38)       | 24 (19-68)       | 17.7 (15-86)     | 26 (20-31)       | 16 (11-92)       |
| <b>IFN<math>\gamma</math></b>   | 2.5 (1.8-3.1)    | 2.8 (2.3-4.5)    | 2.7 (1.7-5.9)    | 3.9 (2.9-7.5)    | 1.6 (0.8-10.5)   |
| <b>IP-10</b>                    | 207 (164-264)    | 371 (248-626)    | 361 (260-576)    | 509 (400-687)    | 267 (223-490)    |
| <b>MCP-1</b>                    | 54 (45-69)       | 55 (41-71)       | 46 (41-64)       | 61 (49-80)       | 38 (25-88)       |
| <b>MCP-4</b>                    | 70 (36-83)       | 47 (39-85)       | 58 (40-99)       | 64 (37-81)       | 58 (50-113)      |
| <b>MDC</b>                      | 1170 (838-1488)  | 1004 (746-1223)  | 841 (674-1056)   | 868 (710-969)    | 1065 (668-1511)  |
| <b>MIP-1<math>\alpha</math></b> | 13.6 (9.6-16)    | 15.4 (14-27.4)   | 14 (10.4-16.2)   | 15.3 (14-27)     | 9.1 (6.7-15.9)   |
| <b>MIP-1<math>\beta</math></b>  | 46.5 (35-89)     | 50 (42-117)      | 50 (36-60)       | 59 (39-93.7)     | 65.7 (45-96)     |
| <b>TARC</b>                     | 38 (21-95.7)     | 59 (23-213)      | 43 (28-79.7)     | 41 (30-52)       | 67 (48-264)      |

ND: not detected; Interleukin- (IL-); Tumor necrosis factor $\alpha$  (TNF $\alpha$ ); Interferon $\gamma$  induced-protein-10 (IP-10); Monocyte chemoattractant protein- (MCP-); Macrophage-derived chemokine (MDC); Monocyte inflammatory protein- (MIP-); Thymus and activation regulated chemokine (TARC).

\*IL-7 concentrations were measured in serum and in a different number of HC, ICL, IR and INR subjects compared to other cytokines/chemokines (HC, n=39; ICL: n=60; INR: n=13; IR: n=8).

**Supplementary Table 3.** Number of differentially expressed genes (DEGs) in transcriptome analysis of PBMC from EXID, ICL, HC, HIV/AIDS subjects before and after 96 weeks of ART.

| <b>Comparison</b>                          | <b>DEGs</b> |
|--------------------------------------------|-------------|
| EXID vs untreated HIV/AIDS                 | 269         |
| EXID vs ART-treated HIV/AIDS IR            | 313         |
| EXID vs HC                                 | 138         |
| EXID vs ICL                                | 24          |
| Untreated HIV/AIDS vs HC                   | 426         |
| ART-treated HIV/AIDS vs untreated HIV/AIDS | 857         |
| ART-treated HIV/AIDS vs HC                 | 0           |

**Supplementary Table 4.** Legend of the differentially regulated genes in PBMC of EXID, HC, and paired HIV/AIDS-untreated subjects pre-ART and after 96 weeks of ART as shown in the dendrogram in **Figure 5A**. Red and Green and Blue genes clusters distinguish EXID from HC, HIV/AIDS-untreated subjects pre-ART and HIV/AIDS-untreated subjects post-ART.

|         |         |          |
|---------|---------|----------|
| LEPROT  | ISCA1   | PAIP2B   |
| LGALS1  | PLVAP   | AKT3     |
| TAGLN2  | TSPAN5  | CDK20    |
| PTGS1   | STAU1   | ZC4H2    |
| CALM3   | EIF2AK1 | PACS2    |
| PRKAR2B | RIOK3   | TIAM1    |
| PPBP    | OAZ2    | ULK2     |
| IFNL1   | BCL2L13 | ZFYVE9   |
| XCL1    | XK      | PWAR5    |
| HES1    | MPP1    | FBLN7    |
| IFRD2   | MXI1    | ACVR1C   |
| ULK4    | MKRN9P  | PARK2    |
| PGLS    | IFI27   | PFN2     |
| TNF     | TOP2A   | PIK3R1   |
| IL1B    | GBP1P1  | MORC4    |
| NR4A1   | TLN2    | IFNG     |
| SPATA6  | UBALD1  | CD69     |
| NR4A2   | MAP2K3  | ICOSLG   |
| TSPAN4  | OAZ1    | PASK     |
| DRAM2   | NPRL3   | IL11RA   |
| IFI27L2 | WBP2    | AXIN2    |
| IFI30   | FOXO3   | PEX7     |
| CD68    | WNK1    | FBLN5    |
| TYROBP  | TAL1    | TNFRSF25 |
| IFITM10 | TNIP1   | TCF7     |
| OASL    | UBALD2  | OXNAD1   |
| CD63    | MXD4    | DOCK9    |
| RETN    | FOXO4   | TRABD2A  |
| THEMIS2 | TCF3    | NR3C2    |
| RASGRP4 | NPLOC4  | TCEA3    |
| DOK3    | MAP2K7  | NOG      |
| MKNK1   | CCR5    | PEX3     |
| P2RX1   | AXIN1   | TESPA1   |
| TNFAIP2 | ESCO2   | LEPROTL1 |
| MAP3K11 | NEDD4L  | CAMK4    |
| PPCDC   | OLFM4   | CD28     |
| MBD6    | BPI     | CD40LG   |
| NOTCH1  | LCN2    | IL7R     |
| MBOAT7  | CD24    | ITGA6    |

|         |          |             |
|---------|----------|-------------|
| DOCK5   | DEFA4    | SERINC5     |
| SCARF1  | CEACAM6  | TRAT1       |
| LPPR2   | MPO      | CCR7        |
| RARA    | DEFA3    | PRKCQ-AS1   |
| ATG16L2 | ELANE    | WNT7A       |
| TREM1   | TYMS     | EPHX2       |
| SBNO2   | KIFC1    | N6AMT2      |
| ITGAX   | MKI67    | IL7         |
| TYK2    | NCAPG    | TNFRSF17    |
| REC8    | KIF2C    | IFNLR1      |
| ULK1    | CDK1     | IFI27L1     |
| NOD2    | MXD1     | IFITM4P     |
| RELT    | IFRD1    | THEMIS      |
| ATG2A   | IFITM2   | CD3G        |
| NCF1B   | IL1R1    | CD3D        |
| HLX     | LILRA6   | CD8A        |
| TYMP    | IFNAR2   | CD8B        |
| IRF9    | IFNAR1   | ITK         |
| HSPA6   | ATG3     | CTLA4       |
| HELZ2   | DDX60L   | CD2         |
| IL17RA  | IFIT2    | MICA        |
| MXD3    | MX2      | DPP4        |
| MRVI1   | IL18RAP  | CD3E        |
| LILRB2  | ITGAM    | S1PR1       |
| IGF2R   | DYSF     | INPP4B      |
| P2RY14  | FCGR1B   | NOSIP       |
| WARS    | IFNGR2   | LCK         |
| P2RY13  | IFNGR1   | NPM1        |
| TLN1    | DRAM1    | CD27        |
| SYK     | SERPINB1 | GCNT4       |
| CD4     | FCGR1A   | PWARSN      |
| MSR1    | TNFAIP6  | LDHB        |
| CD300E  | S100A9   | PIK3IP1     |
|         | S100A8   | LEF1        |
|         | BST1     | CD5         |
|         | MAPK14   | FLT3LG      |
|         | NCOA7    | ICOS        |
|         | DDX58    | IL32        |
|         | IFI16    | SNORD116-1  |
|         | IFIT3    | SNORD116-2  |
|         | IFIT1    | SNORD116-24 |
|         | MX1      | SNORD116-8  |
|         | IFIT5    | SNORD116-16 |

|  |           |             |
|--|-----------|-------------|
|  | XAF1      | SNORD116-23 |
|  | PLSCR1    | RTKN2       |
|  | F5        | IFNG-AS1    |
|  | IFIH1     | PAIP2B      |
|  | NCAPH     | AKT3        |
|  | IRF7      | CDK20       |
|  | OTOF      | ZC4H2       |
|  | PARP11    | PACS2       |
|  | AIM2      | TIAM1       |
|  | C3AR1     | ULK2        |
|  | CD177     | ZFYVE9      |
|  | IL18R1    | PWAR5       |
|  | TNFSF13B  | FBLN7       |
|  | PADI2     | ACVR1C      |
|  | IFITM3    | PARK2       |
|  | IFITM1    | PFN2        |
|  | PARP12    | PIK3R1      |
|  | IFI35     | MORC4       |
|  | OAS3      | IFNG        |
|  | USP18     | CD69        |
|  | ISG15     | ICOSLG      |
|  | IFI6      | PASK        |
|  | OAS1      | IL11RA      |
|  | OAS2      | AXIN2       |
|  | IFI44     | PEX7        |
|  | IFI44L    | FBLN5       |
|  | SPATS2L   | TNFRSF25    |
|  | SCARB2    | TCF7        |
|  | NEDD4     | OXNAD1      |
|  | S100P     | DOCK9       |
|  | ARG1      | TRABD2A     |
|  | CEACAM1   | NR3C2       |
|  | PTX3      | TCEA3       |
|  | SERPINB10 | NOG         |
|  | MMP8      | PEX3        |
|  | KIF4A     | TESPA1      |
|  | PDCD1LG2  | LEPROTL1    |
|  | UBAP1     | CAMK4       |
|  | JAK2      | CD28        |
|  | NLRC4     | CD40LG      |
|  | VNN1      | IL7R        |
|  | SAMD9L    | ITGA6       |
|  | SAMD9     | SERINC5     |
|  | EIF2AK2   | TRAT1       |

|  |         |            |
|--|---------|------------|
|  | DDX60   | CCR7       |
|  | S100A12 | PRKCQ-AS1  |
|  | MMP9    | WNT7A      |
|  | GBP3    | EPHX2      |
|  | PIK3CB  | N6AMT2     |
|  | ITSN1   | IL7        |
|  | NPL     | TNFRSF17   |
|  | BRCA1   | IFNLR1     |
|  | MBOAT2  | IFI27L1    |
|  | STAT2   | IFITM4P    |
|  | PARP14  | THEMIS     |
|  | TNFSF10 | CD3G       |
|  | GBP1    | CD3D       |
|  | STAT1   | CD8A       |
|  | PARP9   | CD8B       |
|  | OLR1    | ITK        |
|  | NCAPG2  | CTLA4      |
|  | BCL2L15 | CD2        |
|  | CAMP    | MICA       |
|  | TCN1    | DPP4       |
|  | CRISP3  | CD3E       |
|  | RMI1    | S1PR1      |
|  | CASP3   | INPP4B     |
|  | CASP10  | NOSIP      |
|  | KMO     | LCK        |
|  | INPP1   | NPM1       |
|  | CXCL10  | CD27       |
|  | PDCD10  | GCNT4      |
|  | ATG2B   | PWARSN     |
|  | C3      | LDHB       |
|  | GBP4    | PIK3IP1    |
|  | PLD1    | LEF1       |
|  | HP      | CD5        |
|  | PGLYRP1 | FLT3LG     |
|  | ORM1    | ICOS       |
|  | PADI4   | IL32       |
|  | IFIT1B  | SNORD116-1 |

**Supplementary Table 5.** Top differentially regulated genes in EXID compared to ART-treated HIV/AIDS subjects (in blu top downregulated genes: log<sub>2</sub> fold change ≤ 1.5, 20 genes; in red upregulated genes: log<sub>2</sub> fold change ≥ 1.5, 18 genes), as shown in Figure 5C.

| Gene ID (name)                                                      | Pathway / Function                                                         | Log <sub>2</sub> FC | Adjusted p Value |
|---------------------------------------------------------------------|----------------------------------------------------------------------------|---------------------|------------------|
| <b>FBLN5</b> (Fibulin 5)                                            | Integrin-binding extracellular matrix protein                              | -2.69               | 0.00075          |
| <b>GCNT4</b> (Glucosaminyl transferase 4)                           | Glycans synthesis: high thymic expression, role in lymphocytes trafficking | -2.61               | 0.00075          |
| <b>TCEA3</b> (transcription elongation factor 3)                    | Regulator of efficiency of transcription                                   | -2.61               | 0.00061          |
| <b>LEF1</b> (lymphoid enhancer binding factor 1)                    | T and B cell specific transcriptional factor                               | -2.50               | 0.00061          |
| <b>CAMK4</b> (calcium/calmodulin protein kinase 4)                  | Cellular kinase implicated in transcriptional regulation in lymphocytes    | -2.48               | 0.00087          |
| <b>CD5</b>                                                          | Regulator of TCR mediated signal transduction.                             | -2.17               | 0.00075          |
| <b>SNORD116-1</b> (small nucleolar RNA116)                          | Transcription regulator                                                    | -2.13               | 0.00733          |
| <b>TRATI</b> (TCR transmembrane adaptor1)                           | Associated with TCR, stabilized and regulate its signaling                 | -2.11               | 0.00075          |
| <b>CD28</b>                                                         | Costimulation of TCR for T cells activation, survival and proliferation    | -2.02               | 0.00485          |
| <b>DOCK9</b> (Dedicator of cytokinesis 9)                           | Guanine nucleotide exchange factor: cell cycle regulation/actin remodeling | -1.98               | 0.00087          |
| <b>IL7R</b> (IL-7 receptor, CD127)                                  | T cell development and survival                                            | -1.87               | 0.00218          |
| <b>FLT3LG</b> (Fms-related tyrosine kinase 3 ligand)                | Growth and differentiation factor for several hematopoietic lineages       | -1.83               | 0.00545          |
| <b>CD3D</b> (CD3 delta chain)                                       | Component of TCR-CD3 complex                                               | -1.76               | 0.00640          |
| <b>THEMIS</b> (Thymocyte Selection Associated)                      | Regulator of late thymocyte development                                    | -1.76               | 0.00640          |
| <b>CD27</b>                                                         | Costimulatory molecule for B and T cells activation                        | -1.74               | 0.00927          |
| <b>TESPA1</b> (Thymocyte Expressed Positive Selection Associated 1) | Regulator TCR signaling in T cell development and activation               | -1.58               | 0.00522          |
| <b>NOSIP</b> (Nitric Oxide Synthase Interacting Protein)            | Modulate activity of nitric oxide (NO) synthase and thus NO production     | -1.58               | 0.00061          |
| <b>ITK</b> (IL2 Inducible T Cell Kinase)                            | Regulator T cell activation and differentiation                            | -1.54               | 0.00218          |
| <b>RUVBL1</b> (RuvB Like AAA ATPase 1)                              | ATP-dependent chromatin remodeling and histone modification                | -1.50               | 0.00203          |
| <b>CD3G</b> (CD3 gamma chain)                                       | Component of TCR-CD3 complex                                               | -1.50               | 0.00548          |
| <b>LILRA6</b> (Leukocyte Immunoglobulin Like Receptor A6)           | Orphan surface receptor with presume immunomodulant function               | 2.76                | 0.00075          |
| <b>ATG16L2</b> (Autophagy Related 16 Like 2)                        | Role in autophagy                                                          | 2.50                | 0.00075          |
| <b>DYSF</b> (Dysferlin)                                             | Adhesion of monocytes and expression in muscle skeletal cells              | 2.32                | 0.00073          |
| <b>TNFAIP2</b> (TNF Alpha Induced Protein 2)                        | Mediator of Inflammation and angiogenesis                                  | 2.21                | 0.00069          |
| <b>CACNA1D</b> (Calcium Voltage- Gated Channel Subunit Alpha1 D)    | Calcium signaling in lymphocytes and multiple other cell types             | 2.18                | 0.00069          |
| <b>LOC146880</b> (Pseudogene)                                       | Pseudogene of Rho GTPase Activating Protein 27                             | 2.17                | 0.00075          |
| <b>ULK1</b> (Unc-51 Like Autophagy Activating Kinase 1)             | Role in autophagy                                                          | 2.07                | 0.00044          |
| <b>NCF1B</b> (Pseudogene)                                           | Pseudogene of neutrophil cytosolic factor 1B                               | 2.03                | 0.00073          |
| <b>ST3GAL6</b> (Sialyltransferase 6)                                | Production of trisaccharide (CD22 ligand): lymphocytes adhesion/activation | 1.98                | 0.00043          |
| <b>NBEAL2</b> (Neurobeachin Like 2)                                 | Platelets development and function                                         | 1.96                | 0.00500          |
| <b>TCIRG1</b> (T Cell Immune Regulator 1)                           | T cell activation, regulation of intracellular pH                          | 1.94                | 0.0070           |
| <b>P2RX1</b> (Purinergic Receptor P2X 1)                            | Intracellular signaling in response to extracellular ATP                   | 1.94                | 0.0052           |
| <b>PLEKHO2</b> (Pleckstrin Homology Domain Containing O2)           | M-CSF-mediated macrophages survival                                        | 1.93                | 0.0052           |
| <b>NOD2</b> (Nucleotide-binding oligomerization domain- protein 2)  | Pattern recognition receptor involved in autophagy and innate responses    | 1.86                | 0.0037           |
| <b>FAM63A</b> (Family with sequence similarity 63)                  | Ubiquitous expression, unknown function                                    | 1.71                | 0.0019           |
| <b>MAML3</b> (Mastermind Like Transcriptional Coactivator 3)        | Transcriptional coactivator NOTCH: cell development and T cell function    | 1.70                | 0.0055           |
| <b>CMIP</b> (C-Maf Inducing Protein)                                | T cell function and cytoskeletal organization                              | 1.57                | 0.0021           |
| <b>NACC2</b> (NACC Family Member 2)                                 | Transcriptional repressor and regulator p53 pathway                        | 1.52                | 0.0073           |

## **Supplementary Methods**

### **Transcriptome bioinformatic analysis**

25 libraries were run as 2 x 100 bp paired end reads on 4 lanes of an Illumina HiSeq 2500 sequencer, which produced ~19.7 million reads per sample. Reads were trimmed for the Clontech Template Switching Oligo, adapter sequence and trimmed and filtered for low quality sequence using the FASTX-Toolkit. Remaining reads were mapped to the human genome assembly NCBI hg38 using Hisat2. Reads mapping to genes were counted using htseq-count. Differential expression analysis was performed using the Bioconductor package DESeq2. Further analysis was performed using Partek Genomic Suite.

### **Immunohistochemistry**

Immunohistochemical staining of lymph node and orbital mass biopsies was performed on 5- $\mu$ m tissue sections. Heat-induced epitope retrieval was performed by heating sections in 0.01% citraconic anhydride containing 0.05% Tween-20 then incubated with antibody to MxA (M143, 1:2000) or Collagen 1 (C2456, Sigma, 1:800) or CD4 (ab133616, Abcam, 1:100) in combo with CD163 (NCL-CD163, Novo Castra, 1:500) and CD68 (CM033C, Biocare, 1:500) diluted in blocking buffer overnight at 4°C. Slides were washed in 1 $\times$  TBS with 0.05% Tween-20, endogenous peroxidases blocked using 1.5% (v/v) H<sub>2</sub>O<sub>2</sub> in TBS, pH 7.4, for 5 min, incubated with rabbit or mouse Polink- 1 or 2 horseradish peroxidase (HRP) and developed with Imm pact™ DAB (3,3'-diaminobenzidine; Vector Laboratories) and wrap red according to manufacturer's recommendations. All slides were washed in H<sub>2</sub>O, counterstained with haematoxylin, mounted in Permount (Fisher Scientific), and scanned at high magnification (x200) using the ScanScope CS System (Aperio Technologies), yielding high-resolution data from the entire tissue section. Representative regions of interest (0.4mm<sup>2</sup>) were identified and high-resolution images extracted from these whole-tissue scans. The percentage area positive for MxA, Collagen1 and CD4+T cells was quantified using Cell profiler version 3.1.5.

### **Inflammasome and caspase-1 analysis**

Cells were acquired using an Amnis ImageStreamX Mark II (Millipore Sigma) imaging flow cytometer and the integrated software INSPIRE (Millipore Sigma) was used for data collection.

Images were analyzed by using image-based algorithms in the ImageStream Data Exploration and Analysis Software (IDEAS 6.2.64.0, Millipore Sigma).

- Healthy subjects (HC)
  - Immunological Responders (IR)
  - ▼ Immunological non-responders (INR)
  - ▲ EXID1
  - ⬠ EXID2
  - ▾ EXID3
  - ⬡ EXID4
  - EXID5
- Extreme immunological decline (EXID)

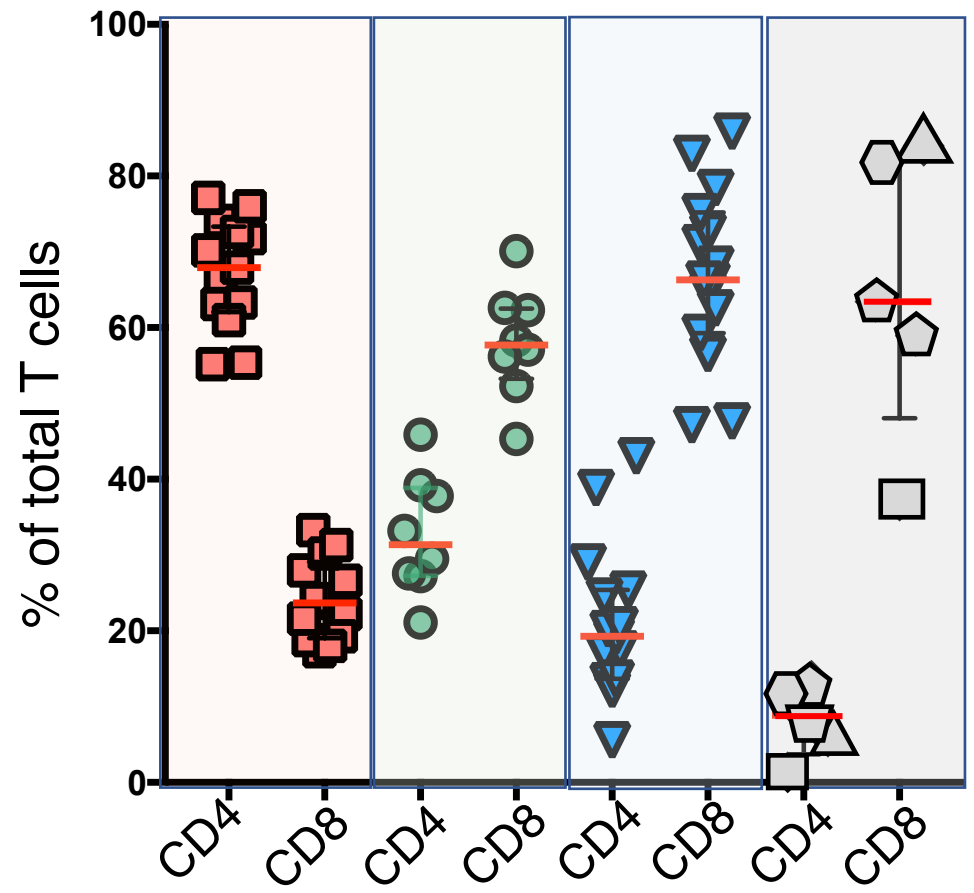

**Supplementary Figure 1**

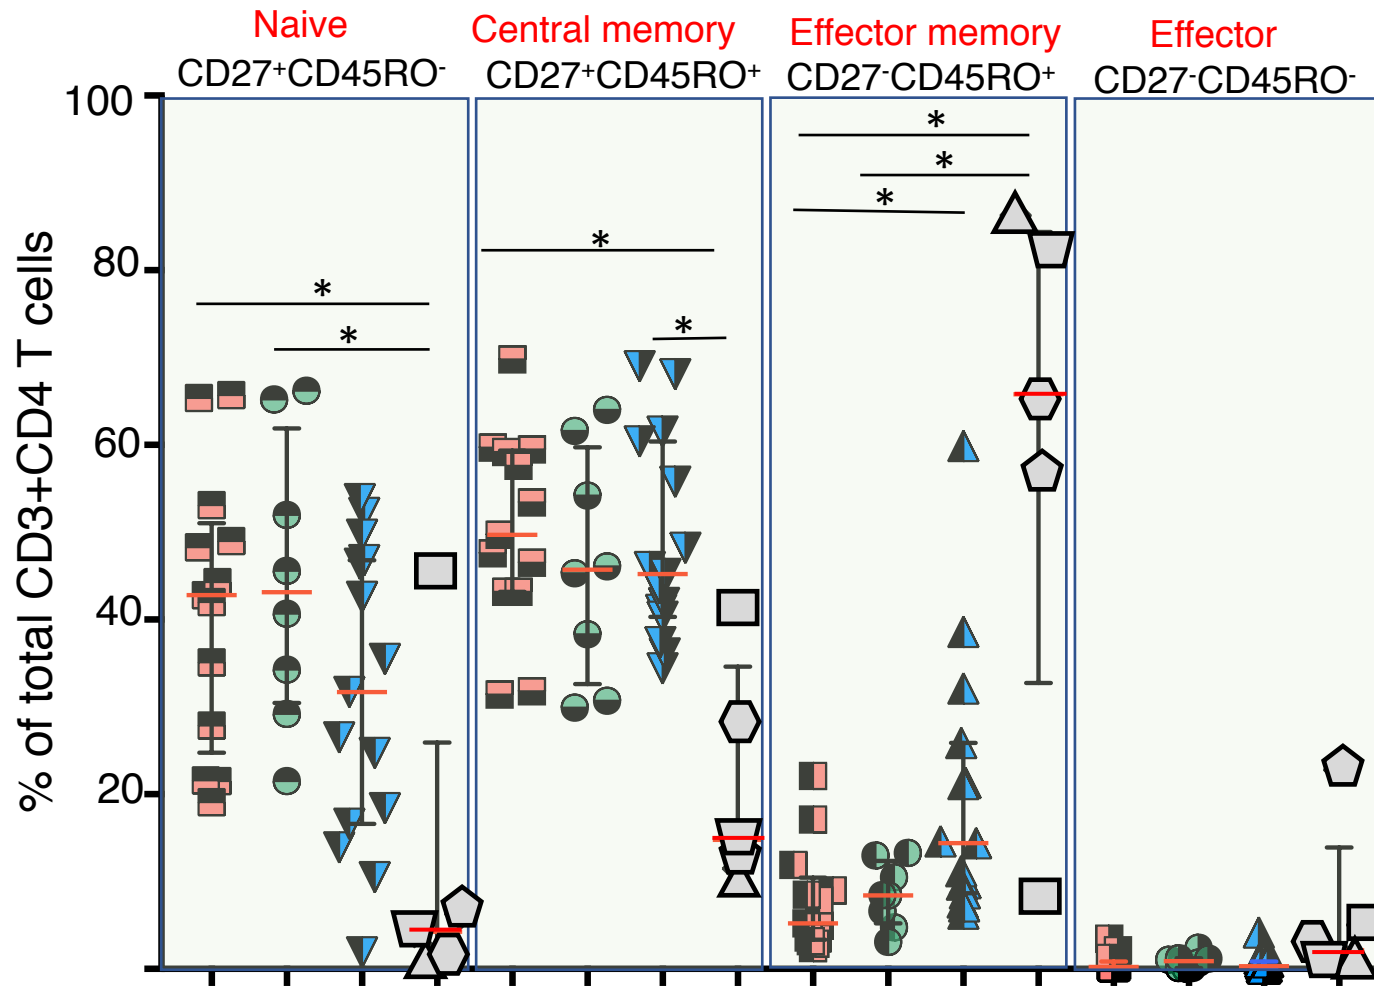

**Supplementary Figure 2**

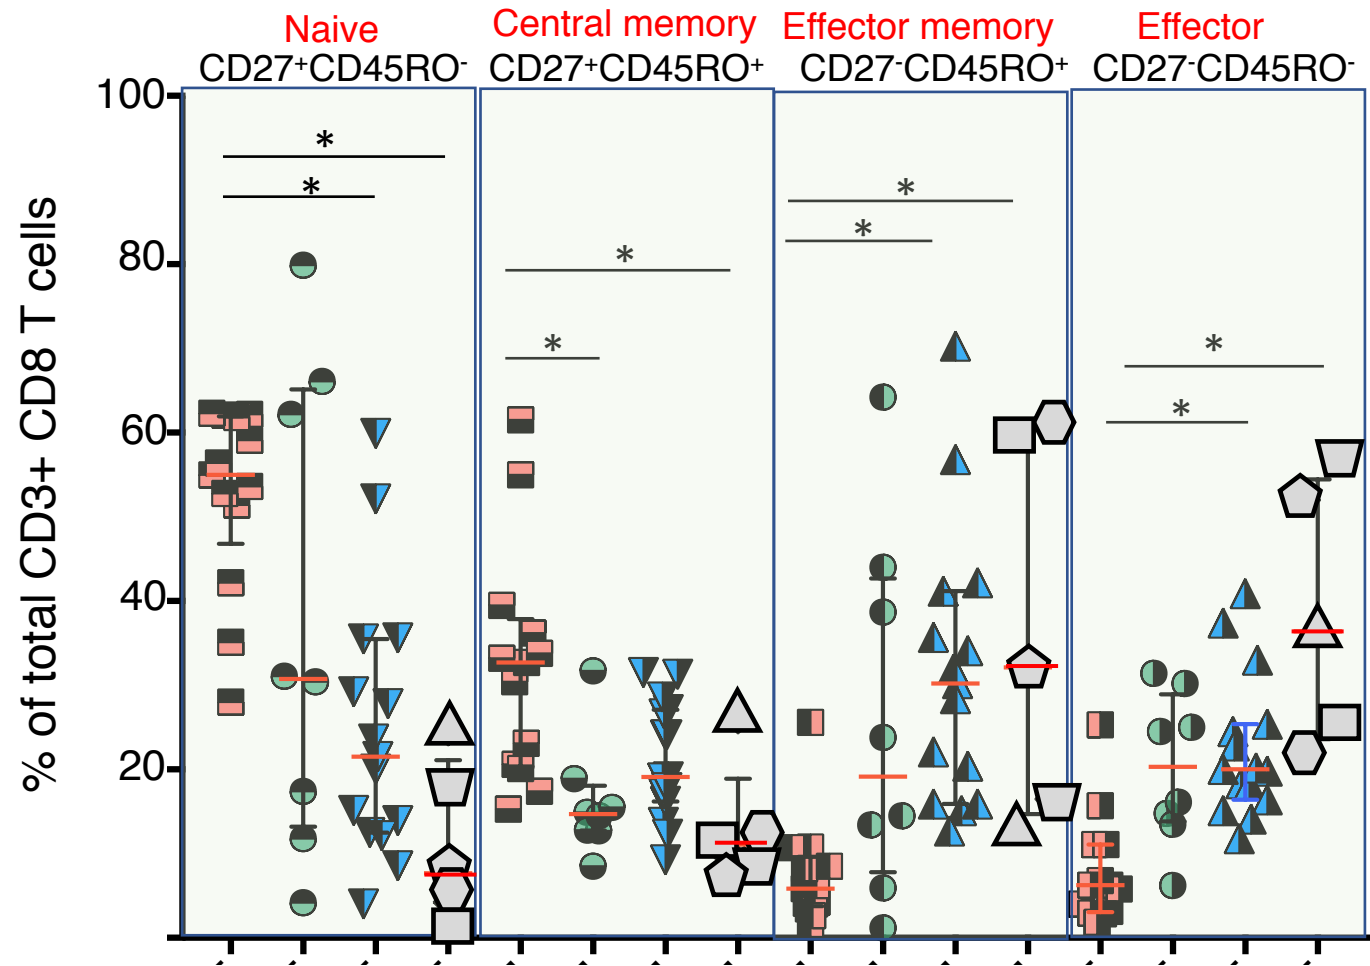

- Healthy subjects (HC)
  - Immunological Responders (IR)
  - ▼ Immunological non-responders (INR)
  - △ EXID1
  - ◑ EXID2
  - ◒ EXID3
  - ◓ EXID4
  - ◔ EXID5
- Extreme immunological decline (EXID)

**Supplementary Figure 3**

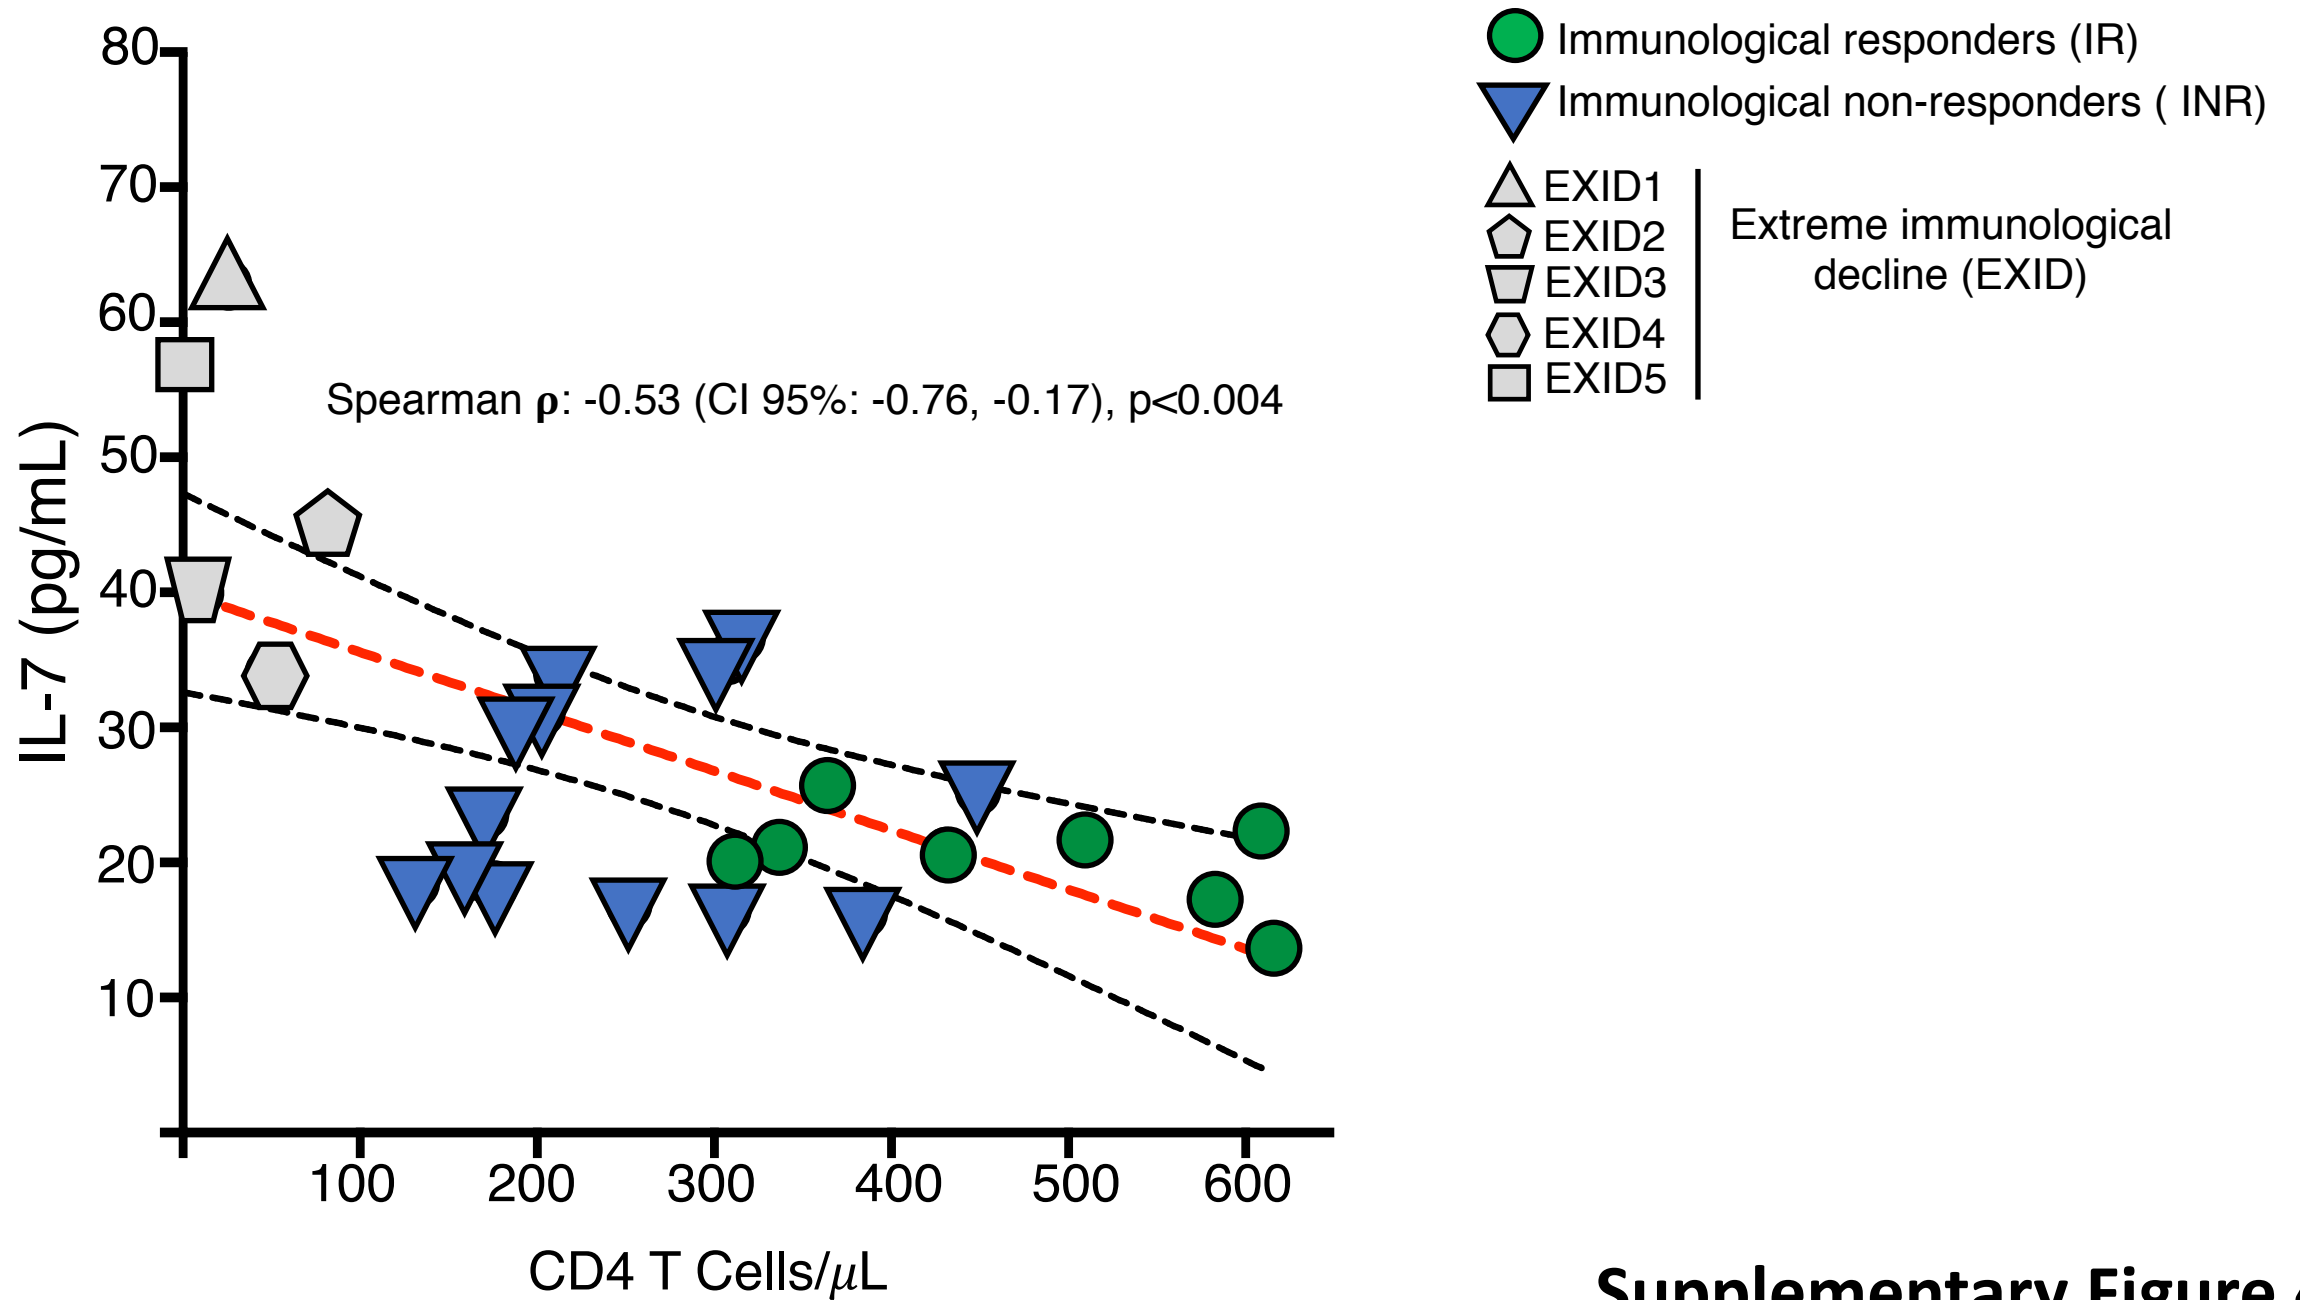

**Supplementary Figure 4**

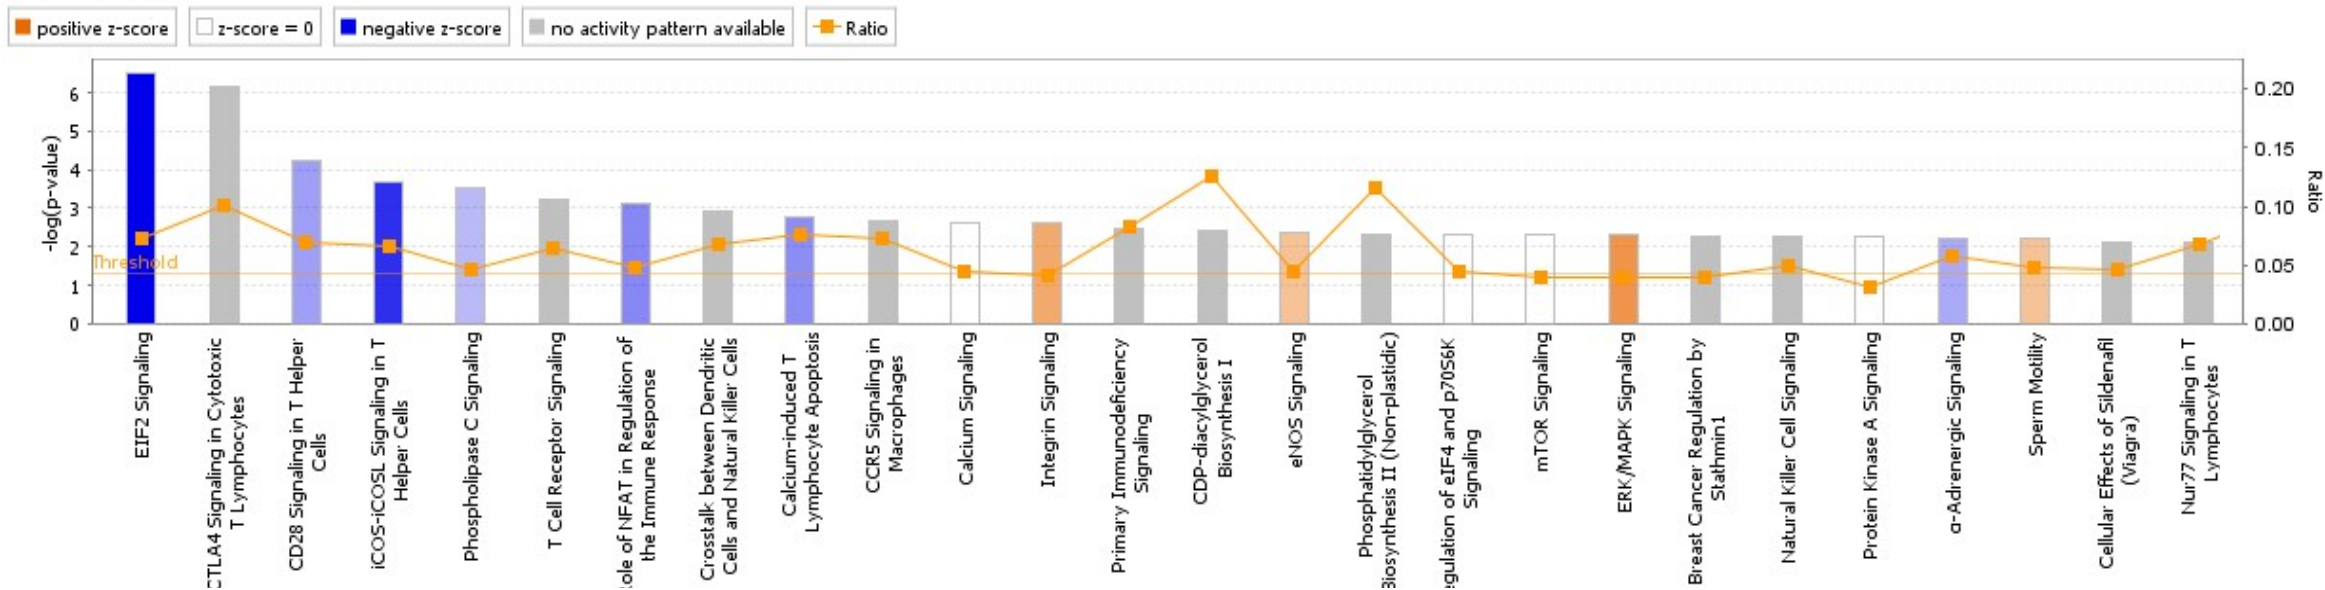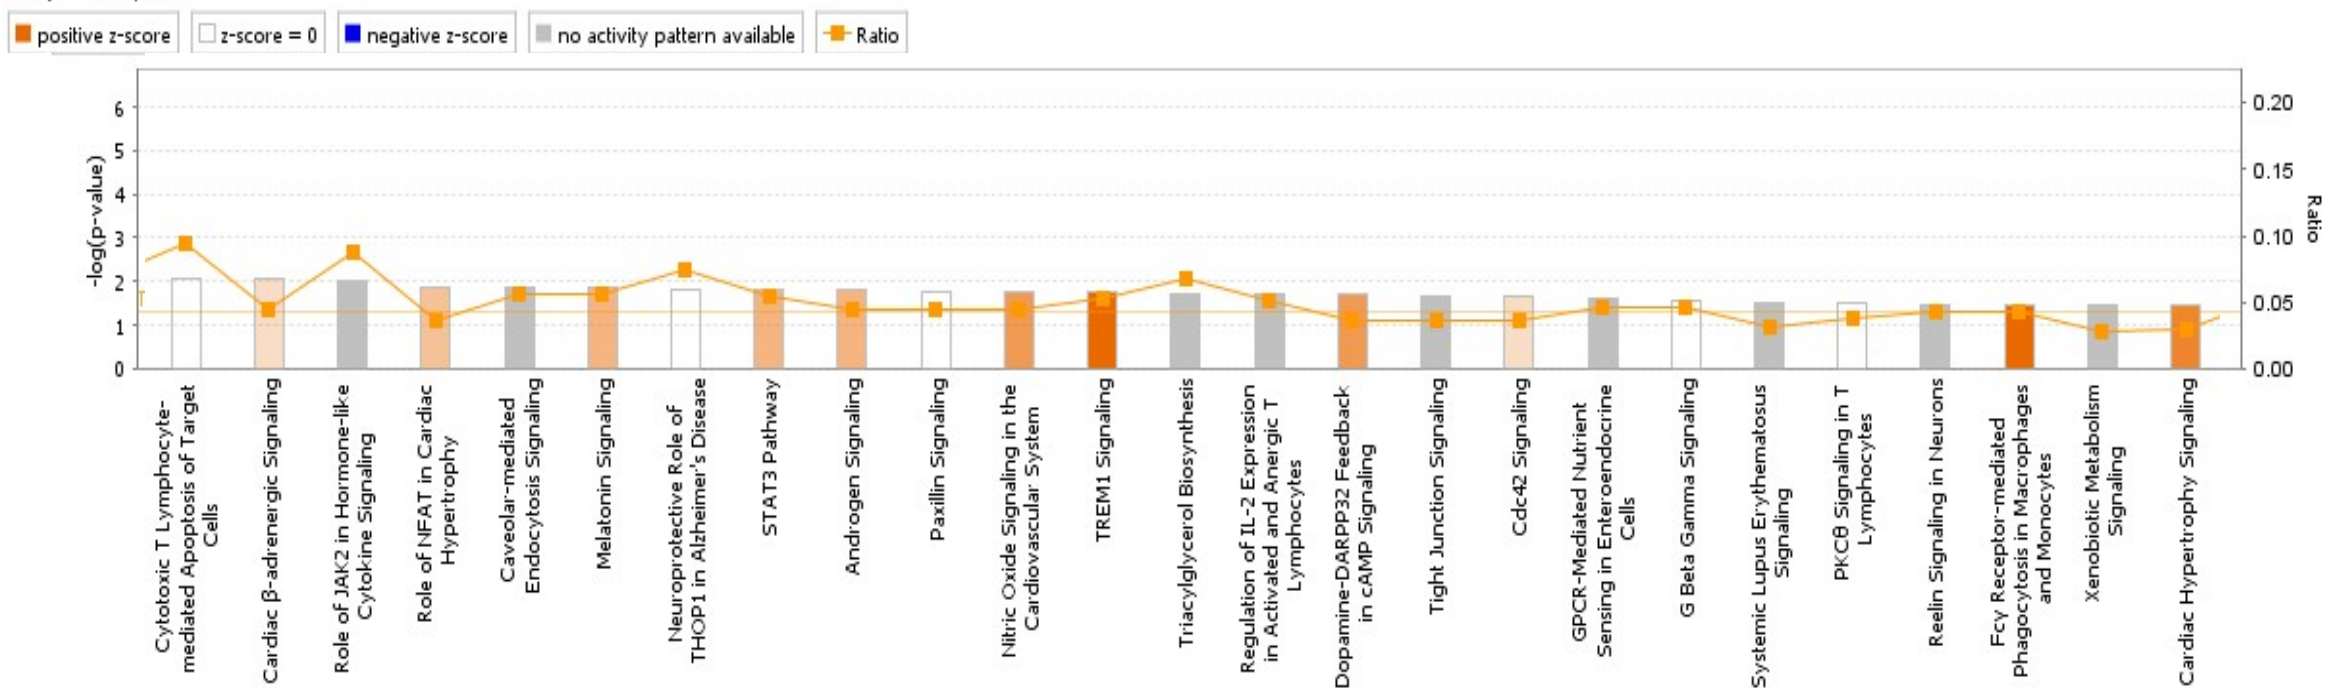

Supplementary Figure 5

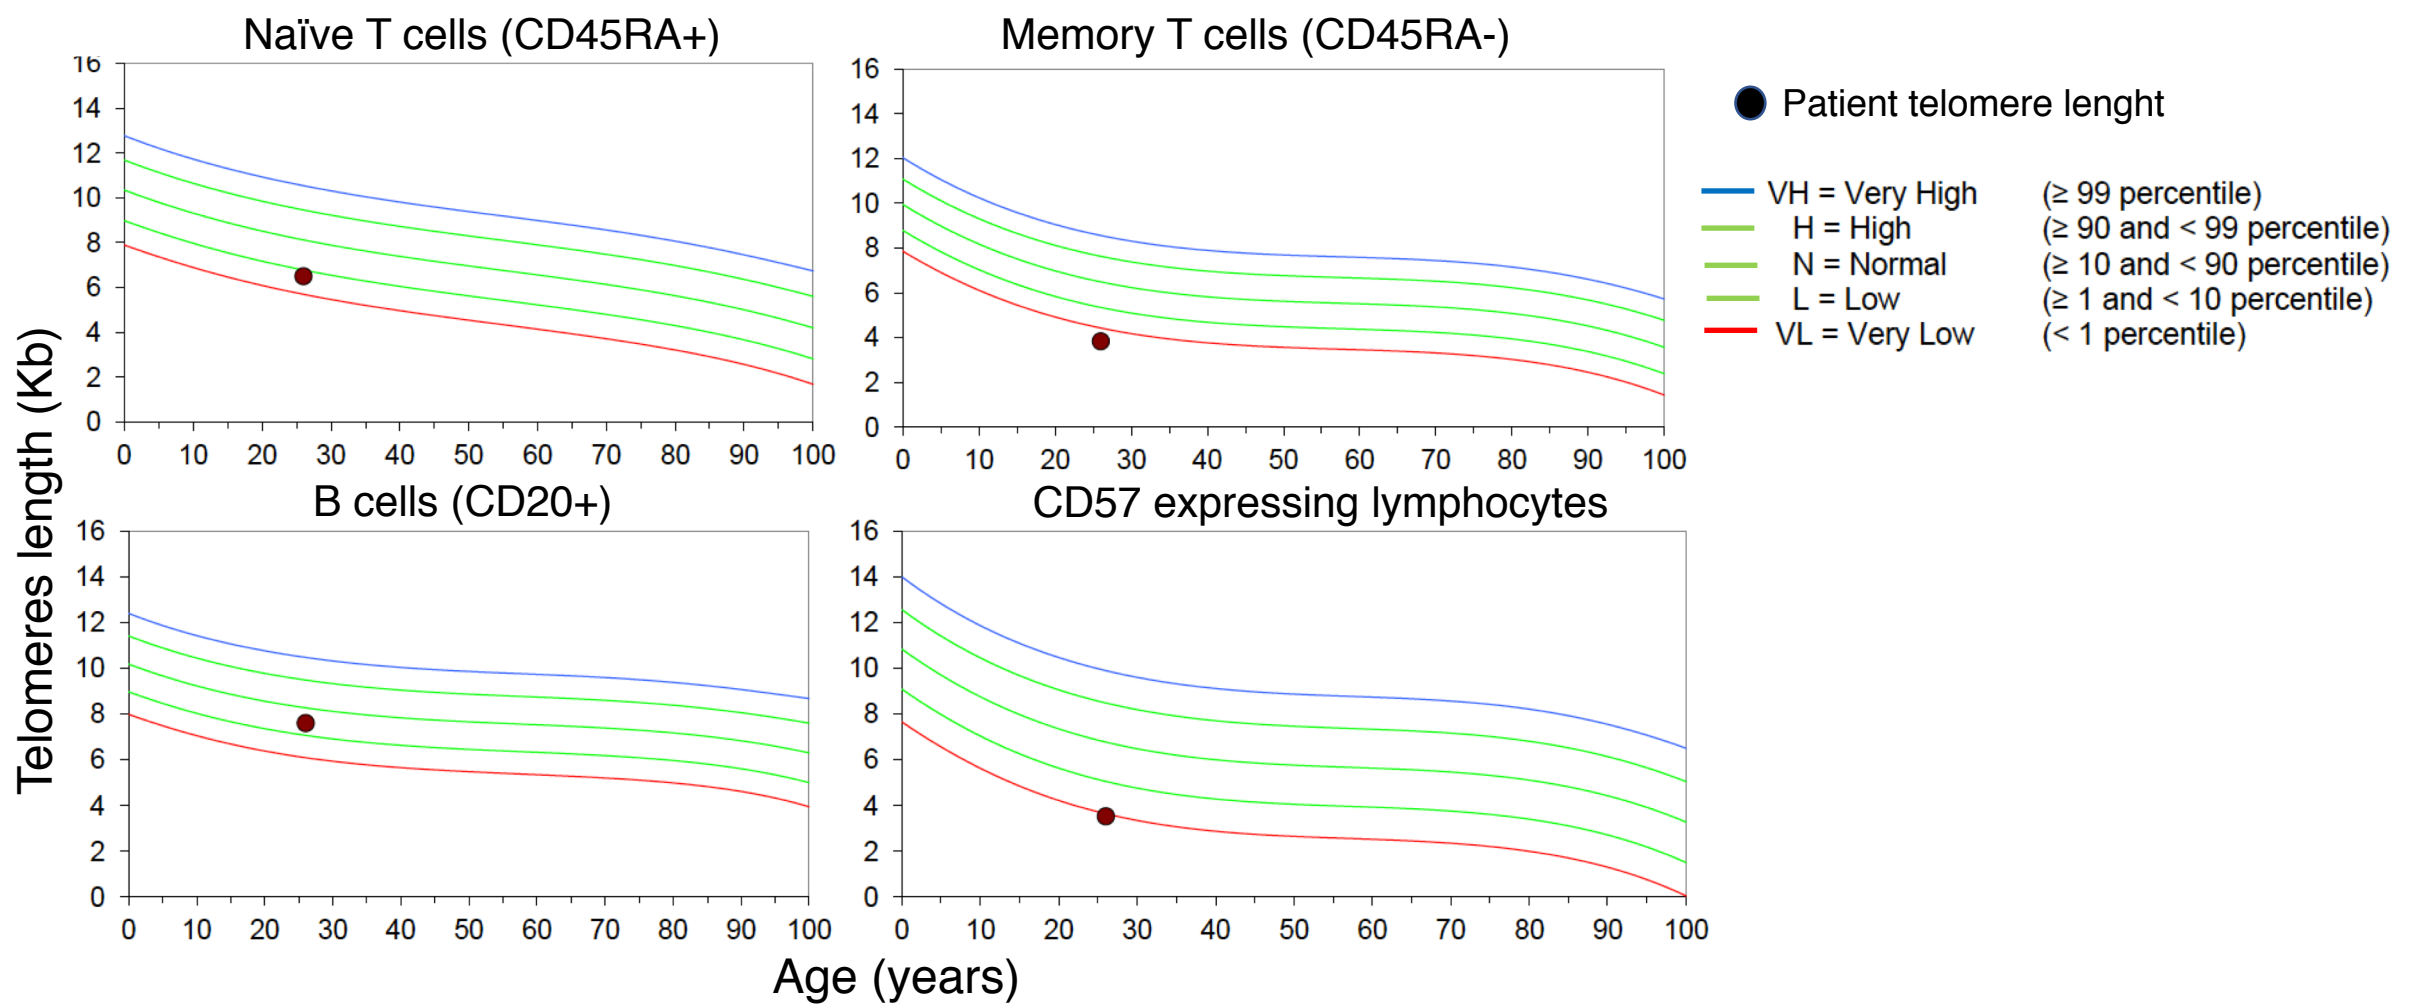

| Lymphocytes |      |     | Granulocytes |      |     | CD45RA+ (Naïve T) |      |     | CD45RA- (Memory T) |      |     | CD20+ (B Cells) |      |     | CD57+ (NK Cells) |      |     |
|-------------|------|-----|--------------|------|-----|-------------------|------|-----|--------------------|------|-----|-----------------|------|-----|------------------|------|-----|
| MTL         | MTLN | INT | MTL          | MTLN | INT | MTL               | MTLN | INT | MTL                | MTLN | INT | MTL             | MTLN | INT | MTL              | MTLN | INT |
| (kb)        | (kb) |     | (kb)         | (kb) |     | (kb)              | (kb) |     | (kb)               | (kb) |     | (kb)            | (kb) |     | (kb)             | (kb) |     |
| <b>4.7</b>  | 7.5  | VL  | <b>6.7</b>   | 8.6  | L   | <b>6.5</b>        | 8.1  | L   | <b>3.8</b>         | 6.5  | VL  | <b>7.6</b>      | 8.3  | N   | <b>3.5</b>       | 6.8  | VL  |

MTL = Patient Median Telomere Length  
 MTLN = Normal MTL at age (50th percentile)  
 INT = Telomere length interpretation

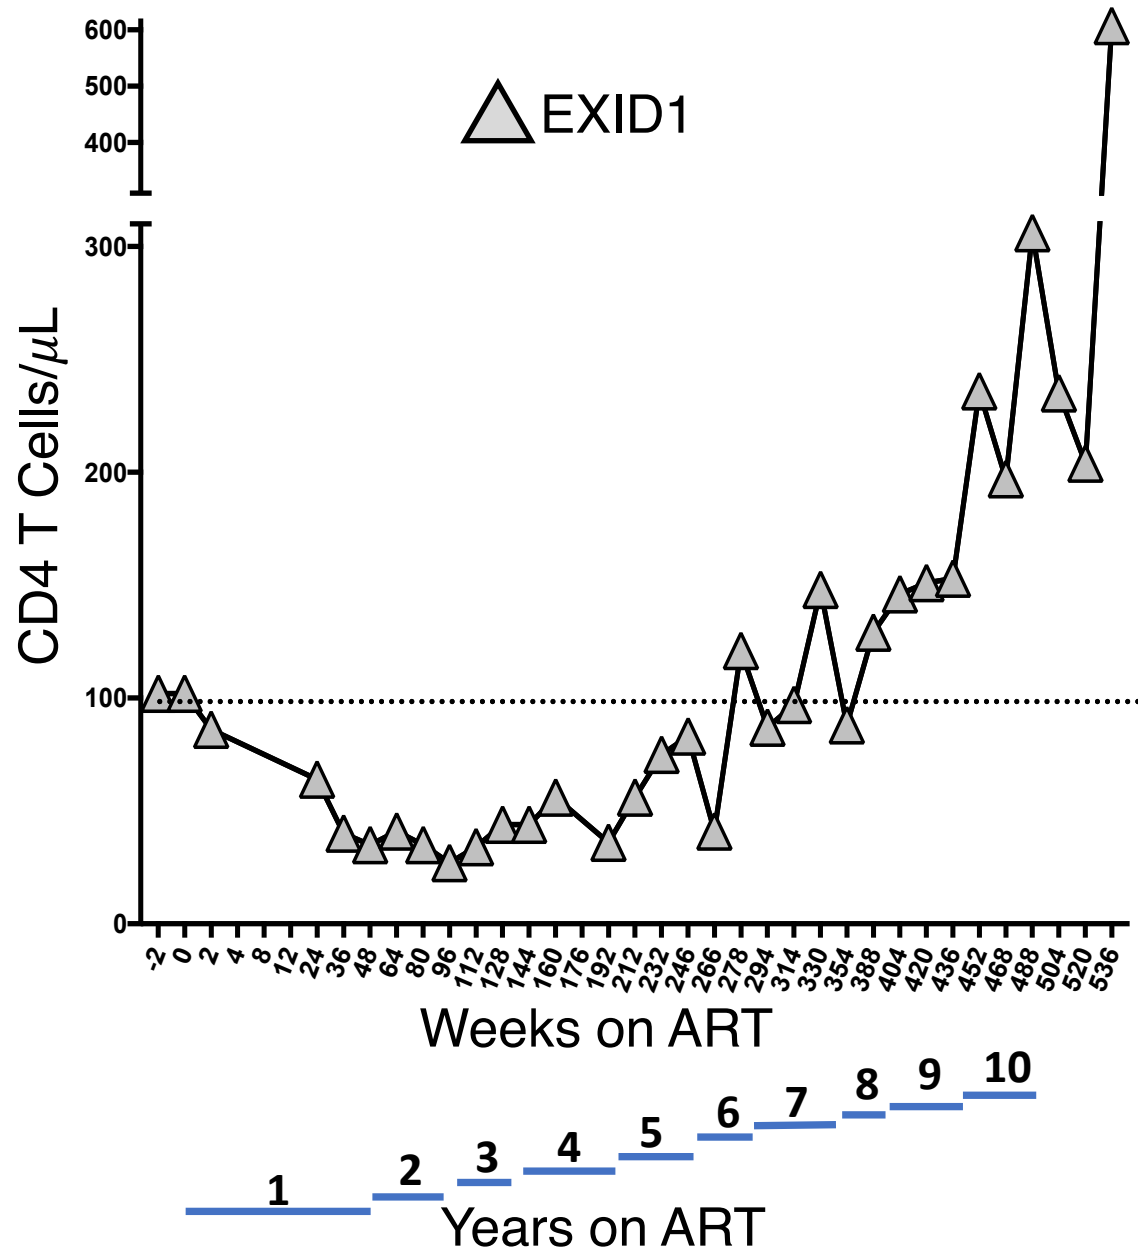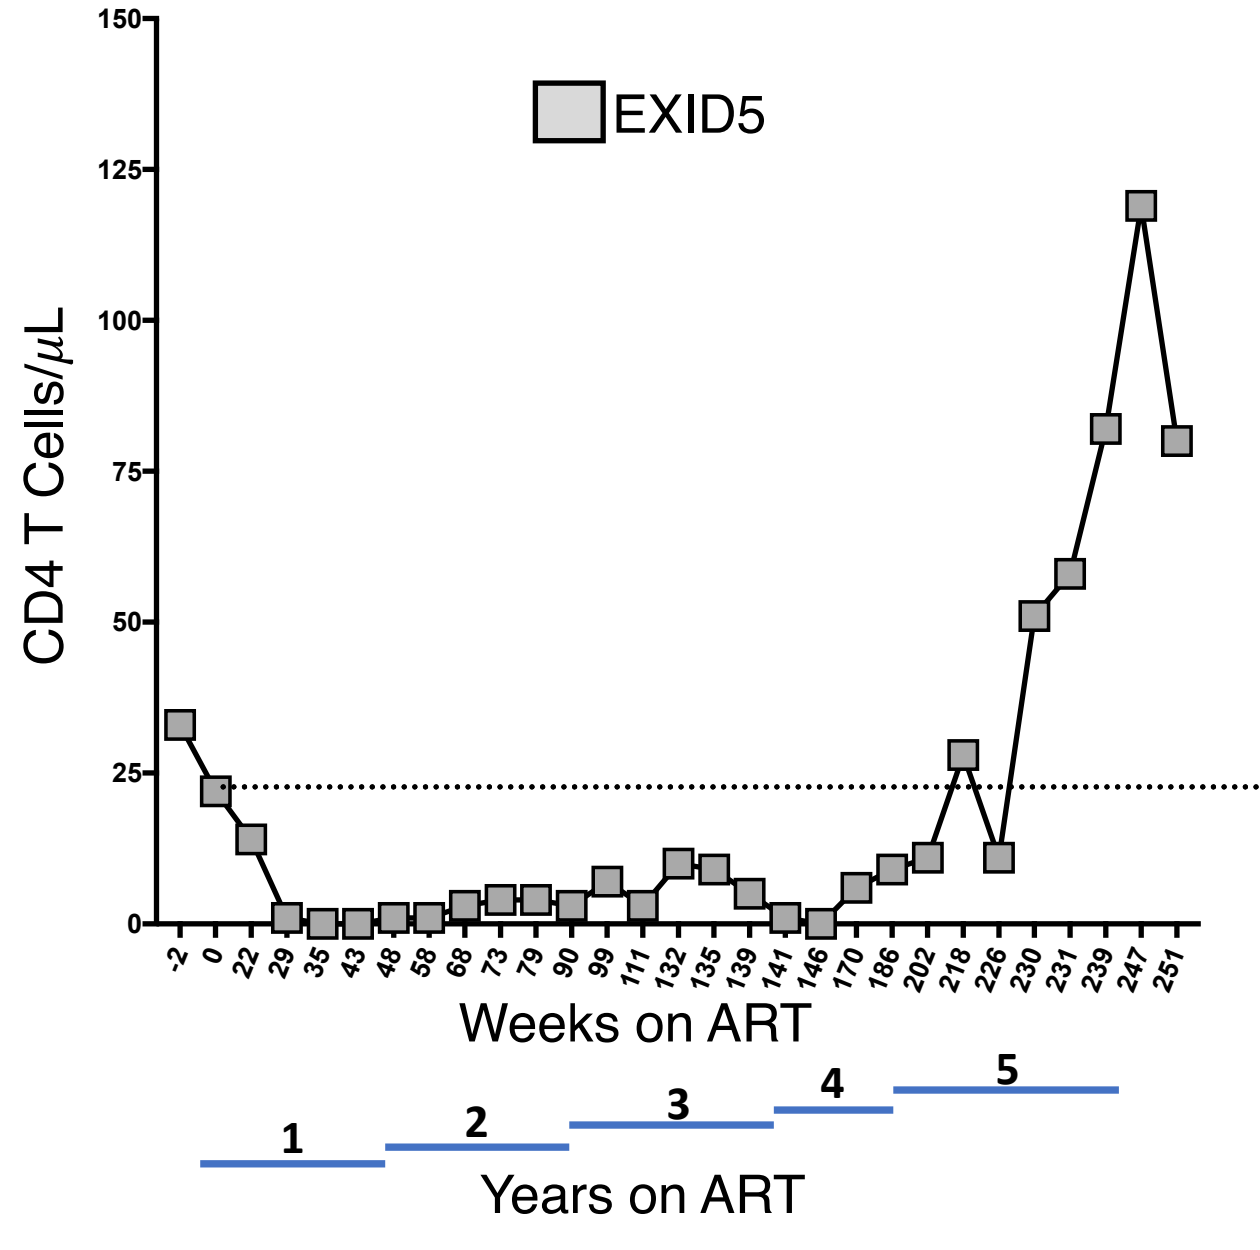

**Supplementary Figure 7**

EXID 4

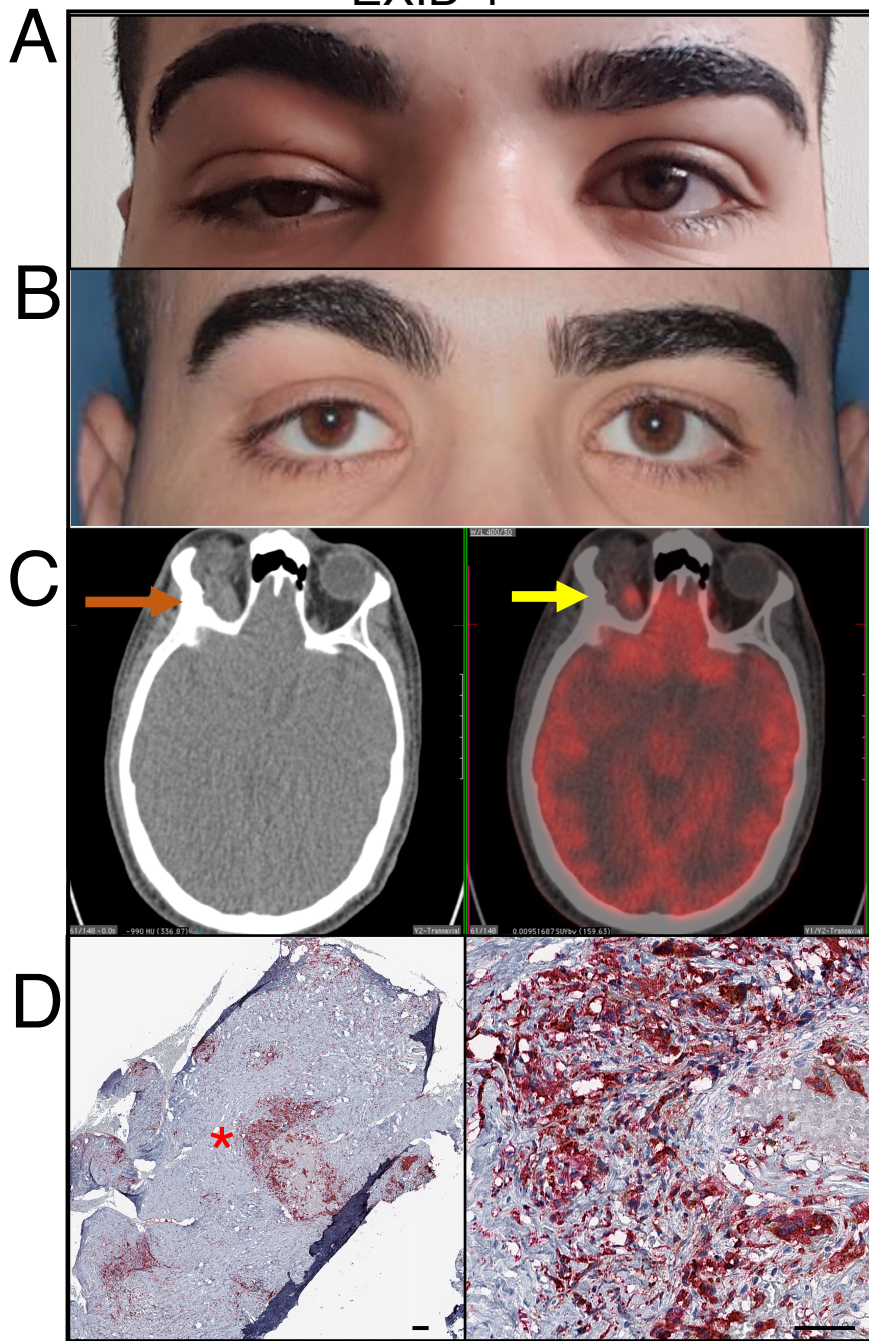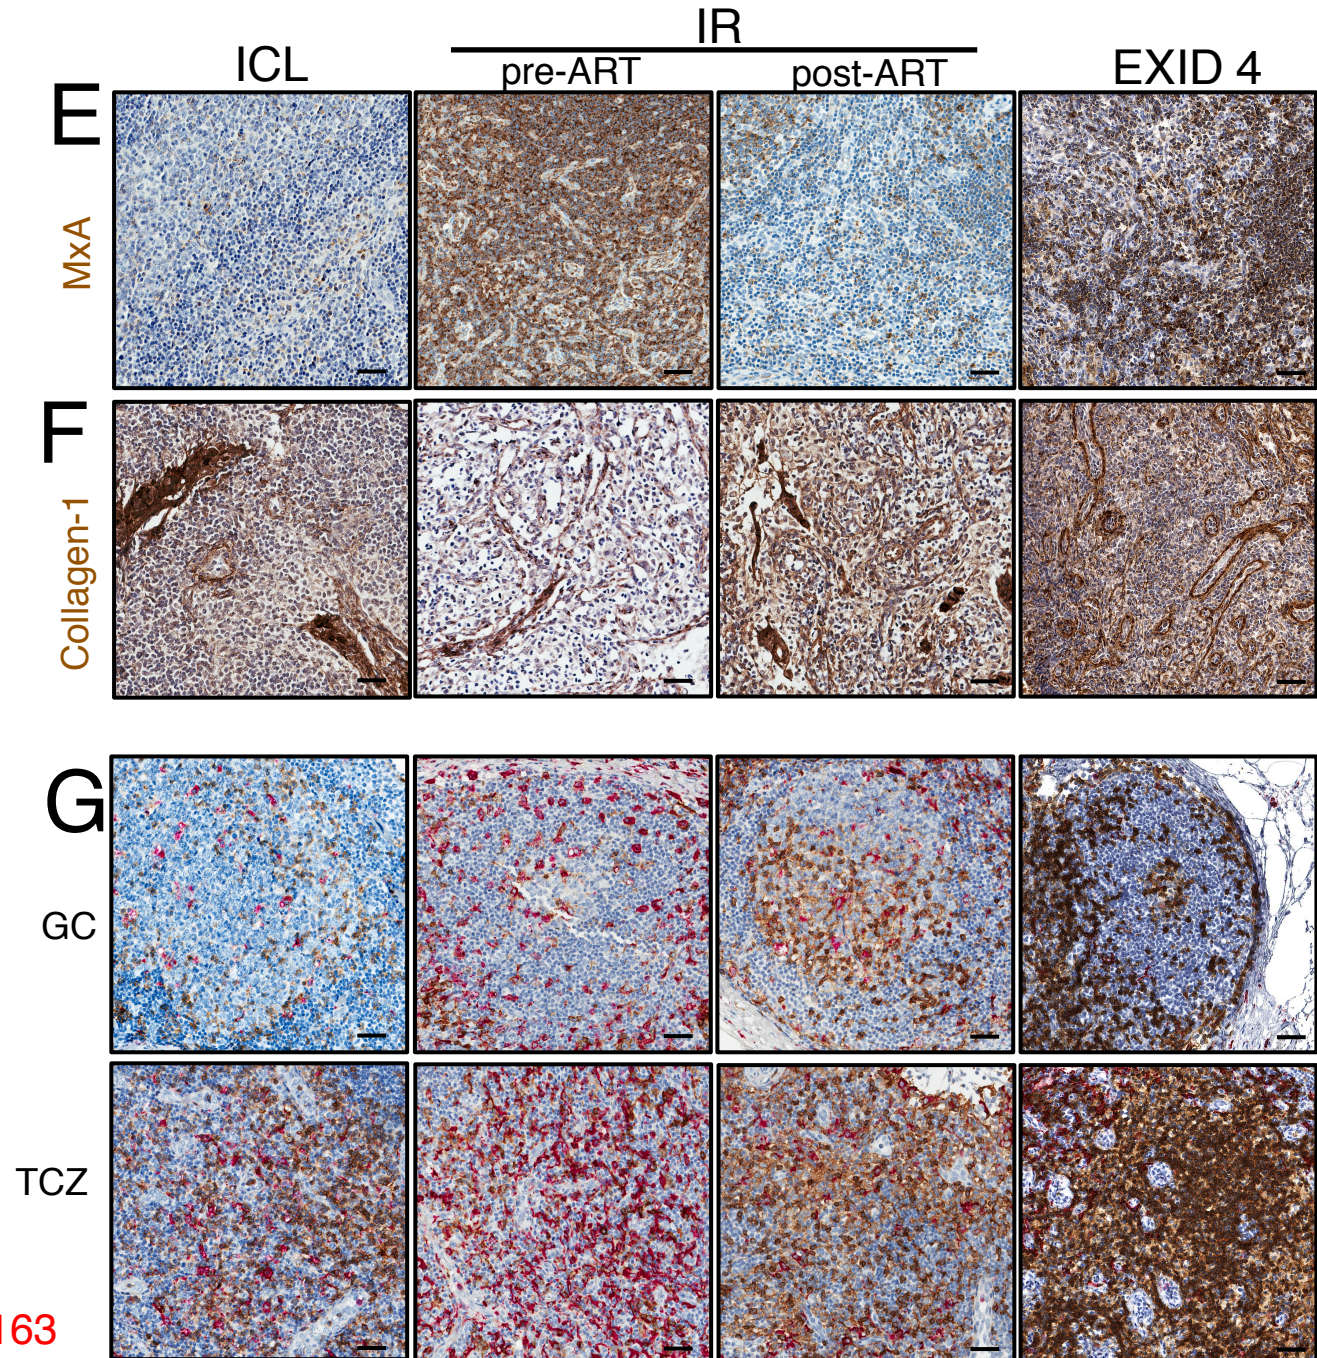

Supplementary Figure 8

**A**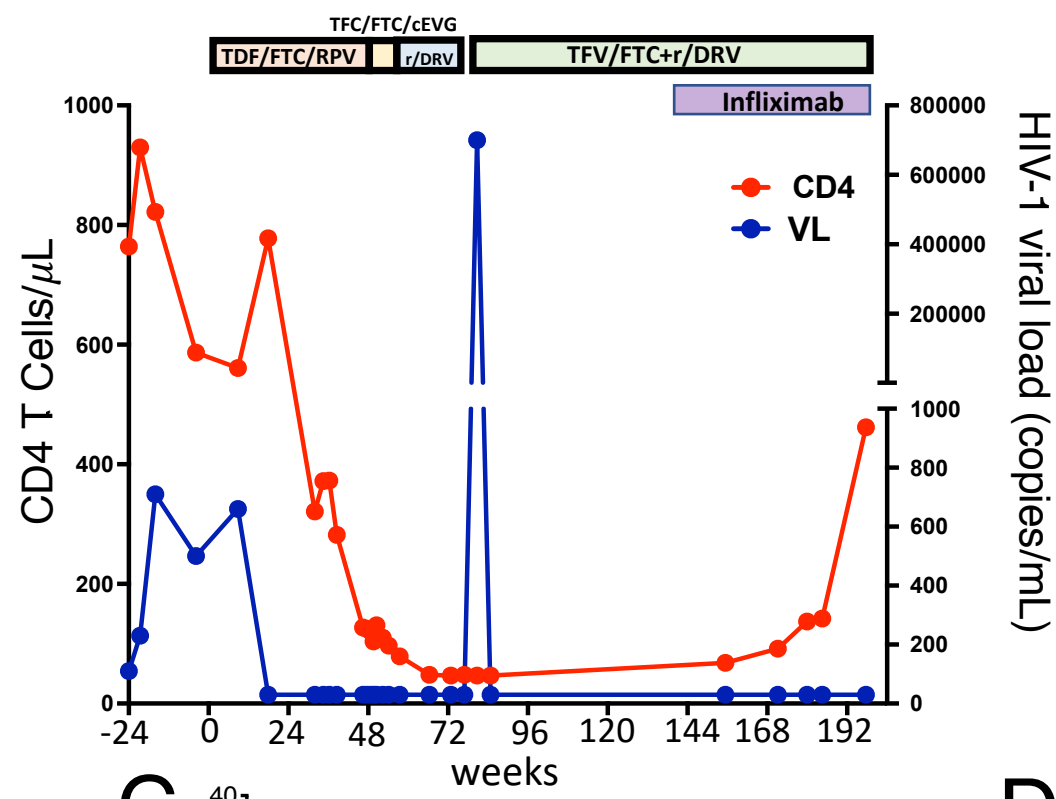**B**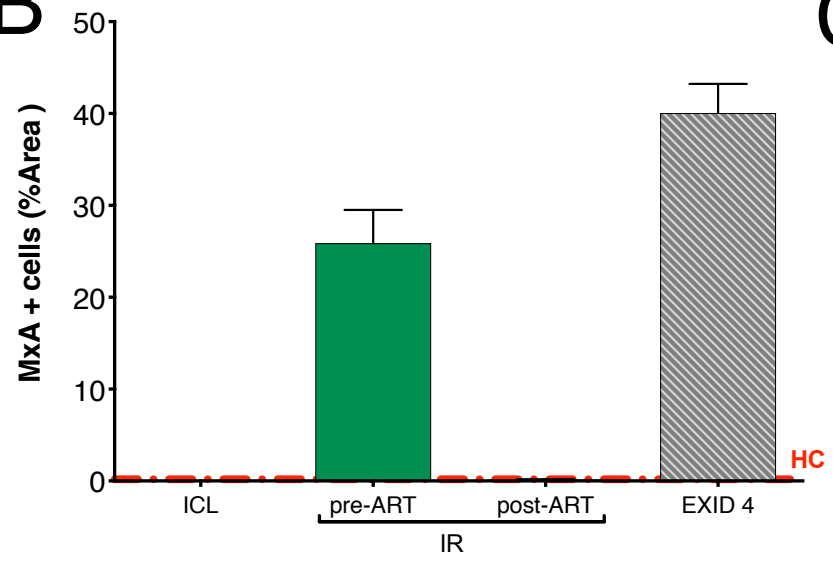**C**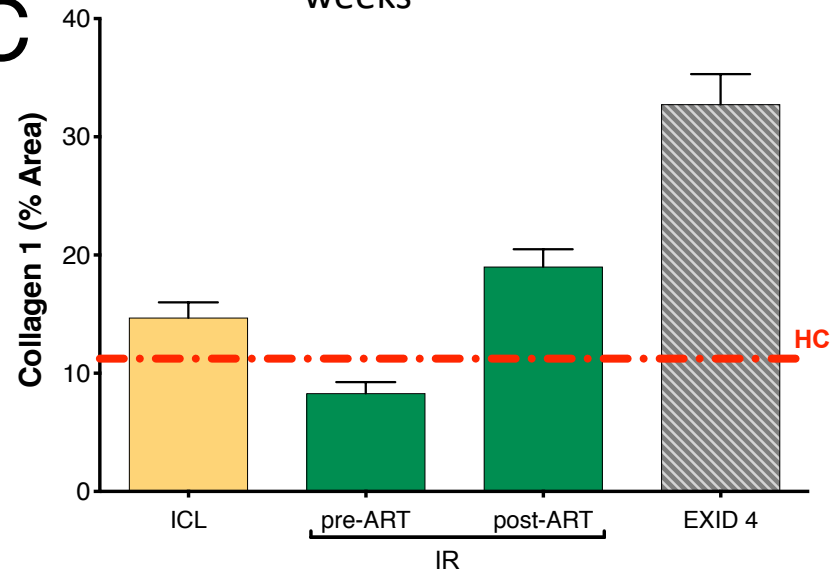**D**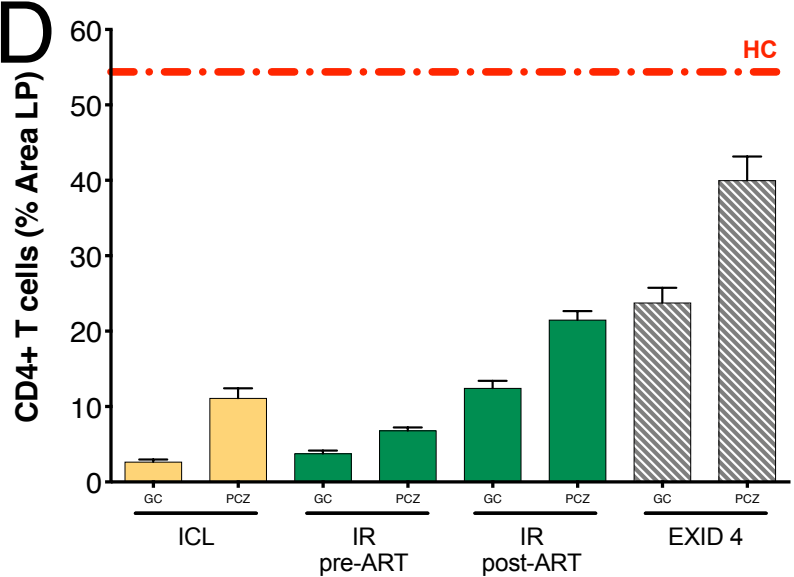**Supplementary Figure 9**

**A**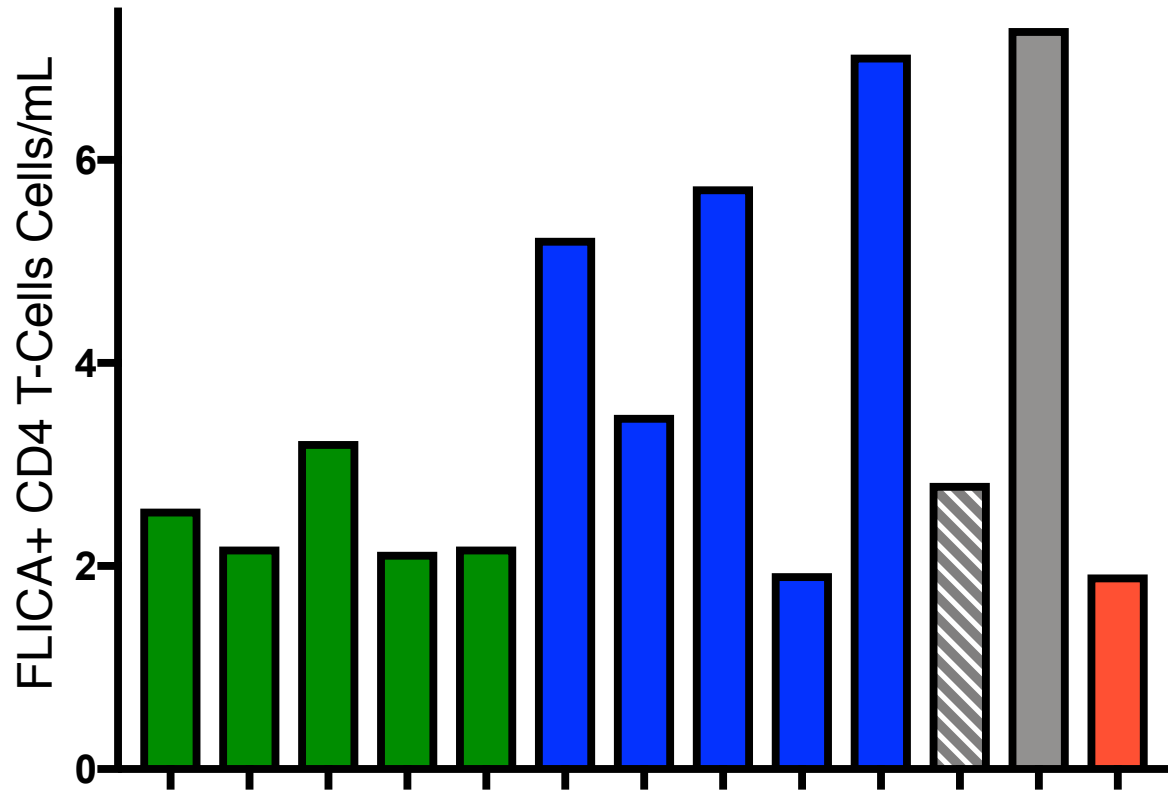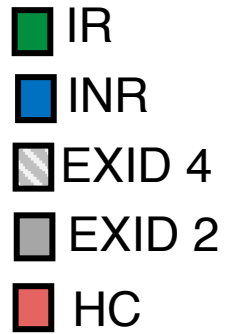**B**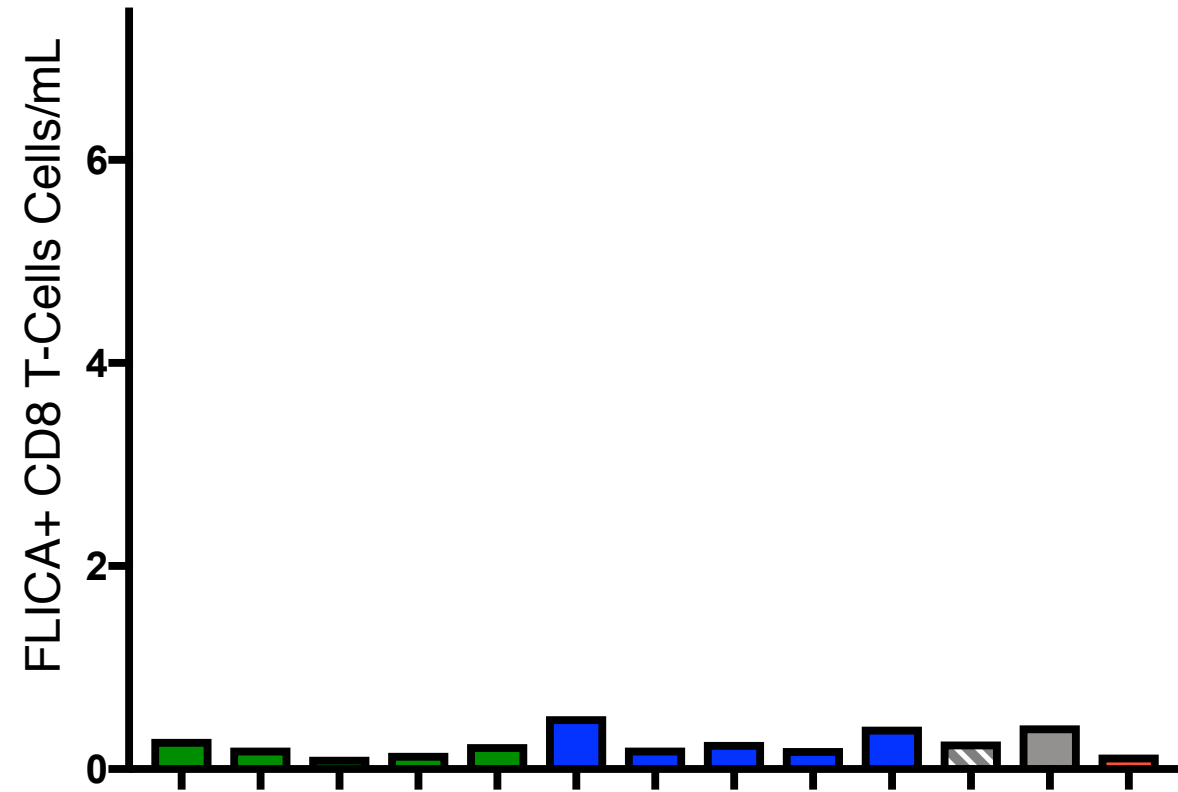

Supplement: sd1 [file 1]
